1 **A potent and selective inhibitor for the modulation of MAGL**  
2 **activity in the neurovasculature**

3

4 Short title: MAGL inhibition modulates 2-AG in neurovascular cells

5

6 Alicia Kemble<sup>1,2</sup>, Benoit Hornsperger<sup>1</sup>, Iris Ruf<sup>1</sup>, Hans Richter<sup>1</sup>, Jörg Benz<sup>1</sup>, Bernd Kuhn<sup>1</sup>, Dominik  
7 Heer<sup>1</sup>, Matthias Wittwer<sup>1</sup>, Britta Engelhardt<sup>3</sup>, Uwe Grether<sup>1</sup>, Ludovic Collin<sup>1\*</sup>

8

9 <sup>1</sup>Roche Pharma Research & Early Development, Roche Innovation Center Basel, F. Hoffmann-La Roche  
10 Ltd., 4070 Basel, Switzerland

11 <sup>2</sup>Graduate School for Cellular and Biomedical Sciences, University of Bern, Bern, Switzerland

12 <sup>3</sup>Theodor Kocher Institute, University of Bern, Bern, Switzerland

13

14 **\*Corresponding author:**

15 Email: ludovic.collin@roche.com

16

17

18

19

20

21

22

23

24

## 25 ABSTRACT

26 Chronic inflammation and blood–brain barrier dysfunction are key pathological hallmarks of neurological  
27 disorders such as multiple sclerosis, Alzheimer’s disease and Parkinson’s disease. Major drivers of these  
28 pathologies include pro-inflammatory stimuli such as prostaglandins, which are produced in the central  
29 nervous system by the oxidation of arachidonic acid in a reaction catalyzed by the cyclooxygenases COX1  
30 and COX2. Monoacylglycerol lipase hydrolyzes the endocannabinoid signaling lipid 2-arachidonyl  
31 glycerol, enhancing local pools of arachidonic acid in the brain and leading to cyclooxygenase-mediated  
32 prostaglandin production and neuroinflammation. Monoacylglycerol lipase inhibitors were recently  
33 shown to act as effective anti-inflammatory modulators, increasing 2-arachidonyl glycerol levels while  
34 reducing levels of arachidonic acid and prostaglandins, including PGE<sub>2</sub> and PGD<sub>2</sub>. In this study, we  
35 characterized a novel, highly selective, potent and reversible monoacylglycerol lipase inhibitor (MAGLi  
36 432) in a mouse model of lipopolysaccharide-induced blood–brain barrier permeability and in both  
37 human and mouse cells of the neurovascular unit: brain microvascular endothelial cells, pericytes and  
38 astrocytes. We confirmed the expression of monoacylglycerol lipase in specific neurovascular unit cells *in*  
39 *vitro*, with pericytes showing the highest expression level and activity. However, MAGLi 432 did not  
40 ameliorate lipopolysaccharide-induced blood–brain barrier permeability *in vivo* or reduce the production  
41 of pro-inflammatory cytokines in the brain. Our data confirm monoacylglycerol lipase expression in  
42 mouse and human cells of the neurovascular unit and provide the basis for further cell-specific analysis  
43 of MAGLi 432 in the context of blood–brain barrier dysfunction caused by inflammatory insults.

44

## 45 INTRODUCTION

46 The endocannabinoid system encompasses a vast network of G-protein-coupled receptors, endogenous  
47 signaling ligands and rate-limiting serine hydrolases responsible for endocannabinoid synthesis and  
48 degradation [1]. Cannabinoid receptors 1 and 2 (CB1 and CB2) are the most abundant and well-  
49 characterized cannabinoid receptors [2], although the endocannabinoid system also features several  
50 orphan receptors. Anandamide (AEA) and 2-arachidonyl glycerol (2-AG) are the two major  
51 endocannabinoid signaling lipids in the central nervous system (CNS). They both act as full agonists for  
52 CB1, whereas only 2-AG also acts as a full agonist for CB2. Both agonists are produced in the CNS, but  
53 2-AG levels are ~170 fold higher than AEA levels in the murine brain, so 2-AG is responsible for most  
54 endocannabinoid signaling in that organ [3].

55 Monoacylglycerol lipase (MAGL) is the key rate-limiting enzyme that hydrolyzes 2-AG in the brain. It is a  
56 cytosolic membrane-bound serine hydrolase with two known isoforms of ~33 and ~35 kDa in mice and  
57 humans. MAGL activity is responsible for approximately 85% of 2-AG hydrolysis in the mouse CNS [4],  
58 the remainder hydrolyzed by  $\alpha,\beta$ -hydrolase domain-containing protein 12 (ABHD12), ABHD6 and fatty  
59 acid amide hydrolase (FAAH). The latter is also primarily responsible for the hydrolysis of AEA. The direct  
60 byproducts of 2-AG hydrolysis by MAGL include large pools of glycerol and most of the arachidonic acid  
61 produced in the brain, which is then available for conversion to prostaglandin by the cyclooxygenases  
62 COX1 and COX2. In contrast, phospholipase A<sub>2</sub> (PLA<sub>2</sub>) is the major enzyme responsible for arachidonic  
63 acid production in peripheral tissues, through the hydrolysis of membrane-bound phospholipids [5,6].  
64 The genetic deletion or acute pharmacological blockade of MAGL in wild-type mice increases the levels

65 of 2-AG and achieves a rapid and sustained reduction in the levels of arachidonic acid. Furthermore, the  
66 levels of 2-AG in the brain increased by ~10-fold in *MAGL*<sup>-/-</sup> mice, reflecting a 90% decrease in the rate of  
67 2-AG degradation [7]. MAGL inhibitors therefore provide an effective anti-inflammatory approach  
68 targeting the arachidonic acid/prostaglandin axis in the CNS.

69 The provision of 2-AG confers neuroprotective effects by reducing blood–brain barrier (BBB)  
70 permeability, hippocampal cell death and inflammatory cytokine release in mouse models of traumatic  
71 brain injury and closed head injury [8,9]. Inhibiting MAGL activity in the brain is also beneficial in the  
72 aforementioned mouse models of brain injury and stroke by significantly elevating 2-AG levels while  
73 reducing the levels of arachidonic acid and its downstream metabolites, including prostaglandins and  
74 leukotrienes [8–12]. Furthermore, the pharmacologic inhibition of MAGL ameliorates lipopolysaccharide  
75 (LPS)-induced inflammation by reducing the production of pro-inflammatory cytokines and the  
76 associated vascular permeability [13]. We therefore investigated the role of MAGL and its inhibition at  
77 the cellular level of the BBB using human *in vitro* and mouse *in vivo* models.

78 The BBB is a dynamic vascular complex composed of brain microvascular endothelial cells (BMECs),  
79 which tightly regulate paracellular transport through tight and adherens junctions. These cells regulate  
80 the ability of solutes in the blood to enter the CNS at the capillary level. The BBB is part of a tightly  
81 coordinated cellular network known as the neurovascular unit (NVU) in which endothelial cells are  
82 ensheathed by pericytes and embedded in a shared endothelial basement membrane and further  
83 surrounded by astrocytic end feet processes and a second parenchymal basement membrane which  
84 together form the glia limitans. Pericytes are specialized mural cells that interact directly with the  
85 microvascular endothelial cells while the glia limitans provides an additional layer of coverage. Both  
86 pericytes and astrocytes provide support by maintaining junctional proteins and regulating capillary  
87 vasodilation, blood flow and immune cell extravasation [14,15]. NVU dysfunction is an early pathological  
88 hallmark associated with multiple sclerosis, Alzheimer’s disease and Parkinson’s disease, in which  
89 microvascular dysfunction can promote immune cell infiltration, oxidative stress, impaired transport and  
90 clearance of inflammatory proteins, demyelination and/or neuronal loss [16–21]. The alteration of  
91 endocannabinoid signaling has also been reported in many of these neurological disorders, supporting  
92 the further investigation of endocannabinoid-mediated target therapies.

93 Although MAGL activity has been studied extensively in neurons and glia, little is known about MAGL  
94 expression and activity specifically at the level of the microvasculature and its role in the regulation of  
95 BBB permeability [12,22,23]. An astrocyte-specific *MAGL* knockout mouse model showed that MAGL is  
96 the enzyme primarily responsible for 2-AG hydrolysis in these cells, generating large pools of arachidonic  
97 acid that lead to prostaglandin production in the CNS [7]. The analysis of mouse cerebellar brain slices *ex*  
98 *vivo* suggests that PGE<sub>2</sub> secreted by astrocytes regulates pericyte contraction and, in turn, the  
99 vasodilation and constriction of associated microvessels [24,25]. However, the inhibition of MAGL in NVU  
100 cells (BMECs, pericytes and astrocytes) is incompletely understood.

101 Enzyme inhibitors targeting the endocannabinoid system (including inhibitors of FAAH and MAGL) have  
102 been developed as therapeutics to attenuate prostaglandin-induced inflammation. Several MAGL  
103 inhibitors have been described [11,26,27], but most act irreversibly by forming covalent bonds with the  
104 catalytic Ser122 residue of MAGL[28]. The chronic administration of irreversible MAGL inhibitors in  
105 rodents can lead to CB1-mediated side effects, reflecting prolonged exposure to high levels of 2-AG and  
106 the subsequent desensitization of CB1 receptors, hindering clinical development [29]. This effect was

107 also observed in *MAGL*<sup>-/-</sup> mice [29–31]. Furthermore, irreversible hydrolase inhibitors often lack  
108 selectivity, leading to potential adverse effects that can be fatal in some cases [32]. Therefore, the  
109 development of highly selective reversible MAGL inhibitors could improve the pharmacological control of  
110 enzyme activity and reduce off-target and adverse effects.

111 Here, we describe the characterization of a non-covalent, potent and selective MAGL inhibitor (MAGLi  
112 432) in human and mouse brain lysates. MAGLi 432 (CAS no. 2361575-20-2)[33] is a bicyclopiperazine  
113 derivative optimized from a screening hit, which achieves high exposure in the mouse brain following  
114 intraperitoneal (i.p.) administration. We investigated the species-dependent expression profile of *MAGL*  
115 mRNA and MAGL protein in cultured microvascular endothelial cells, pericytes and astrocytes, and  
116 observed the modulation of cell-specific activity in human cells. We also used a mouse model of LPS-  
117 induced BBB disruption to investigate whether the administration of MAGLi 432 can ameliorate BBB  
118 permeability to 70-kDa dextran tracers and fibrinogen, and its ability to reduce the level of pro-  
119 inflammatory cytokines.

120

## 121 MATERIALS AND METHODS

### 122 Structure determination and refinement of human MAGL complexed 123 with MAGLi 432

124 Human MAGL (residues 1–303) with mutations Lys36Ala, Leu169Ser and Leu176Ser [34] was purchased  
125 from Cepter Biopartners (Nutley, NJ, USA). Before crystallization, the protein was concentrated to 10.8  
126 mg/mL. Crystallization trials based on sitting drop vapor diffusion were carried out at 21 °C. Crystals  
127 appeared within 2 days in solvent (0.1 M MES pH 6.5, 10% PEG MME5K, 12% isopropanol). Crystals were  
128 soaked for 16 hrs in the crystallization solution supplemented with 10 mM MAGLi 432.

129 For data collection, crystals were flash cooled in liquid nitrogen with 20% ethylene glycol added to the  
130 soaking solution as a cryo-protectant. X-ray diffraction data were collected at a wavelength of 0.9999 Å  
131 using an Eiger2X 16M detector at beamline X10SA of the Swiss Light Source (Villigen, Switzerland). Data  
132 were processed using XDS and scaled with SADABS (Bruker, Billerica, MA, USA). The crystals belong to  
133 space group C222<sub>1</sub> with cell axes of a = 91.88 Å, b = 127.43 Å and c = 60.46 Å and diffract to a resolution  
134 of 1.16 Å. The structure was determined by molecular replacement with PHASER [35] using the  
135 coordinates of PDB entry 3PE6- as a search model. Fo-Fc difference electron density map was used to  
136 place MAGLi 432. The structure was refined using the CCP4 suite [36] and BUSTER [37], and model  
137 building done with COOT [38]. Data collection and refinement statistics are summarized in **Table S1**. The  
138 coordinates of the complex structure have been deposited in the Protein Data Bank under accession  
139 number PBD7ZPG.

### 140 Primary cell cultures

141 Primary mouse brain microvascular endothelial cells (pMBMECs), pericytes and astrocytes originated  
142 from CD-1 mice. The pMBMECs (CD-1023) and astrocytes (CD-1285) were obtained from CellBiologics  
143 (Chicago, IL, USA). The pMBMECs were maintained in complete mouse endothelial cell medium from the  
144 CellBiologics W Kit (M1168), whereas astrocytes were maintained in phenol-free astrocyte medium –

145 animal (1831-prf) from ScienCell (Carlsbad, CA, USA). Mouse brain vascular pericytes (ScienCell; M1200)  
146 were maintained in phenol-free pericyte medium – mouse (ScienCell; 1231-prf). All cells were  
147 maintained up to passage 4.

148 Primary human brain cortical pericytes (ScienCell; 1200) were maintained in phenol-free pericytes  
149 medium (ScienCell; 1201-prf), whereas primary human brain cortical astrocytes (ScienCell; 1800) were  
150 maintained in phenol-free astrocyte medium (ScienCell, 1801-prf). Brain microvascular endothelial cells,  
151 hCMEC/D3 cells [39] (Merck, Darmstadt, Germany; SCC066) were cultured in EGM-2 endothelial cell  
152 growth medium-2 from the BulletKit (Lonza, Basel, Switzerland; CC-3162). Pericytes and astrocytes were  
153 used for experiments up to passage 4, whereas hCMEC/D3 cells were used up to passage 40.

## 154 **Animals**

155 Male CD-1 mice, 8–9 weeks of age, were acquired from Charles River (Lyon, France). All mice were  
156 housed individually in ventilated cages in a temperature-controlled environment with a 12-h  
157 photoperiod and were allowed food and water *ad libitum*. All procedures were conducted under the  
158 approval of the Veterinary Office of the Canton of Basel, Switzerland (License 2901).

## 159 **LPS-induced BBB disruption**

160 MAGLi 432 was dissolved in the vehicle solution (a 1:1:8 mixture of DMSO, polysorbate 80 and 0.9%  
161 (w/v) NaCl). LPS from *Escherichia coli* O111:B4 (Sigma-Aldrich, St Louis, MO, USA; L2630) was dissolved in  
162 0.9% NaCl. Mice were randomized to one of three treatment groups (1 = NaCl + vehicle, 2 = LPS + MAGLi  
163 432, 3 = LPS + vehicle) and were injected i.p. with either 0.9% NaCl or 1 mg/kg LPS, followed 30 min later  
164 by the vehicle solution or 2 mg/kg MAGLi 432. Injections were performed for three consecutive days. On  
165 the third day, mice were euthanized 4 h after treatment by the i.p. administration of 150 mg/kg  
166 pentobarbital in 0.9% NaCl. Mice were then perfused with ~20 mL heparin (5 U/mL in phosphate-  
167 buffered saline (PBS), pH 7.4). Brains (divided sagittally into two hemispheres) and plasma were collected  
168 and immediately frozen at –80 °C.

## 169 **In vivo permeability assays and immunofluorescence**

170 Mice were injected in the tail vein with 200 µL fluorescein isothiocyanate (FITC)-labeled dextran (Thermo  
171 Fisher Scientific, Waltham, MA, USA; D1820) prepared as a 25 mg/mL solution in 0.9% NaCl. The dye was  
172 allowed to circulate for 15 min before the mice were euthanized and perfused with ~10 mL heparin (5  
173 U/mL in PBS, pH 7.4) then 10 mL 2% paraformaldehyde (PFA) in PBS (pH 7.4). The brains were fixed in 2%  
174 PFA at 4 °C overnight and then stored in PBS at 4 °C.

175 Whole brains were embedded in 2% agarose blocks and 100-µm sagittal sections were prepared using a  
176 vibratome (Zeiss, Oberkochen, Germany). In all subsequent steps the samples were protected from light.  
177 Sections were then incubated for 1 h with BlockAid Blocking Solution (Thermo Fisher Scientific; B10710)  
178 at room temperature, followed by incubation with a primary antibody specific for CD31 (BD Pharmingen,  
179 Franklin Lakes, NJ, USA; 550274) overnight at 4 °C. Goat anti-rat IgG (H+L) Alexa Fluor 555 (Invitrogen,  
180 Thermo Fisher Scientific; A-21434) was used as the secondary antibody, followed by nuclear staining  
181 with DAPI. Sections were imaged with a Panoramic p250 Slide Scanner (3DHitech, Budapest, Hungary)  
182 and analyzed using CaseViewer v2.64.

## 183 Measurement of brain and plasma fibrinogen

184 One cerebral hemisphere (without the cerebellum or olfactory bulb) was homogenized in  
185 radioimmunoprecipitation (RIPA) assay buffer (Sigma-Aldrich; R0278) containing Pierce protease and  
186 phosphatase inhibitors (Thermo Fisher Scientific; 88669). The tissue in RIPA buffer was placed in 7-mL  
187 Precellys homogenization vials (Bertin Instruments, Montigny-le-Bretonneux, France; P000940-LYSKO),  
188 prefilled with ceramic homogenization beads and was subjected to three 10-s pulses at 6000 rpm in a  
189 Precellys Evolution homogenizer (Bertin Instruments). The lysates were centrifuged twice at 16,300 x g  
190 for 15 min and the supernatants were retained for analysis. For plasma sample collection, blood was  
191 collected by cardiac puncture and placed in EDTA-coated tubes, which were centrifuged at 3220 x g for 5  
192 min. The plasma was collected and centrifuged again at 17,530 x g for 5 min to remove any residual red  
193 blood cells. Brain homogenates (1:30 dilution) and plasma samples (1:100,000 dilution) were analyzed  
194 for fibrinogen levels using an Aviva Systems Biology (San Diego, CA, USA) ELISA kit (GWBBB0BA2).

## 195 RNA extraction, cDNA generation and droplet digital qRT-PCR

196 RNA was extracted from sections of frozen mouse brain cerebrum representing each treatment group  
197 (n = 6 per group) using the Maxwell 16 LEV simplyRNA Tissue Kit (Promega, Ipswich, MA, USA; AS1270).  
198 RNA was extracted from cultured cells using the Maxwell 16 Cell LEV Total RNA Purification Kit (Promega;  
199 AS1225). Corresponding cDNA was prepared using the SuperScript III First-Strand Synthesis System  
200 (Invitrogen).

201 Commercially available TaqMan assays (**Table S2**) for droplet digital PCR were prepared using the  
202 One-Step RT-ddPCR Advanced Kit for Probes (Bio-Rad, Hercules, CA, USA; 1864022). Each 20- $\mu$ L reaction  
203 mix consisted of 10  $\mu$ L ddPCR Supermix for probes (no dUTP) 1  $\mu$ L of each target probe, 1  $\mu$ L of reference  
204 probe and up to 8  $\mu$ L of cDNA or water, making a final volume of 13  $\mu$ L. The reaction mix was then  
205 partitioned into droplets using a QX100 Droplet Generator (Bio-Rad). Target and reference probe  
206 fluorescence amplitudes for each droplet were analyzed using a QX200 Droplet Reader (Bio-Rad) for  
207 digital absolute quantification. Each sample was analyzed in duplicate.

## 208 In vitro investigation of MAGLi 432 and LPS

209 Human astrocytes, pericytes and hCMEC/D3 cells were grown to confluence in T25 flasks. MAGLi 432  
210 was prepared as a 10 mM stock solution in DMSO. LPS was solubilized in HBSS and was prepared as a  
211 1 mg/mL stock solution. One day before the assay, cells were cultured in serum-free media. Cells were  
212 exposed to 1  $\mu$ M MAGLi 432, 0.01% DMSO, no treatment (serum-free medium only), 0.01% HBSS, 50 ng  
213 LPS or 100 ng LPS for 6 h. Media and cell pellets were immediately collected and stored at  $-80^{\circ}$  for  
214 LC-MS analysis or cells were lysed in activity based protein profiling (ABPP) lysis buffer (20  $\mu$ L/mL 1M  
215 HEPES, 2  $\mu$ L/mL 1M DTT, 1  $\mu$ L/mL 1M MgCl<sub>2</sub>, 0.5  $\mu$ L/mL [\(25U/ul\)](#) Benzonase) for ABPP and western blot  
216 analysis.

## 217 Competitive ABPP for MAGL selectivity

218 Homogenates of whole mouse brains or human cortical brain tissue (BioIVT, Westbury, NY, USA) without  
219 disease pathology were prepared in ABPP lysis buffer. Tissue in ABPP lysis buffer was homogenized as  
220 described above, and the lysate supernatants were retained. We incubated 50  $\mu$ g of the lysates with 0.5  
221  $\mu$ L DMSO, 10  $\mu$ M MAGLi 432 or 10  $\mu$ M JZL 184 for 25 min, and then with 0.5  $\mu$ L of 200 nM TAMRA-FP

222 (green) or 5  $\mu$ M MAGL-specific fluorescent probe [40] for 30 min, protected from light. The reaction was  
223 stopped by adding 12.5  $\mu$ L deionized water, 12.5  $\mu$ L 4x sample buffer (Thermo Fisher Scientific; NP0007)  
224 and 5  $\mu$ L reducing agent (Thermo Fisher Scientific; NP0004). We loaded 25  $\mu$ L of cell lysate solution into  
225 the wells of NuPAGE 10% Bis-Tris gels (Invitrogen; NP0301BOX) and run for 55 min at 200 V. We  
226 measured in-gel fluorescence on the ChemiDoc MP System (Bio-Rad) using Cy3 and Cy5 filters. The  
227 membrane was then stained with Coomassie Brilliant Blue for total protein quantification (**Fig. S1**).

## 228 Competitive ABPP/western blot for MAGL dose response

229 Brain lysates (50  $\mu$ g) as described above were incubated for 25 min with 0.5  $\mu$ L DMSO or ascending doses  
230 of MAGLi 432 (1 nM, 10 nM, 100 nM, 1  $\mu$ M or 10  $\mu$ M). Lysates were then incubated for a further 30 min  
231 with 0.5  $\mu$ L of the 5  $\mu$ M MAGL-specific fluorescent probe [40]. The reaction was stopped and  
232 electrophoresis was carried out as described above. Proteins were transferred to nitrocellulose  
233 membranes (Invitrogen; IB23001) using the iBlot 2 System (Invitrogen). Membranes were blocked in 5%  
234 skimmed milk in PBS (pH 7.4) containing 0.01% Tween-20 (Sigma-Aldrich, P1379) for 1 h at room  
235 temperature and were incubated overnight at 4  $^{\circ}$ C with primary rabbit polyclonal antibodies against  
236 mouse MAGL (Abcam, Cambridge, UK; ab180016) or human MAGL (LSBio, Seattle, WA, USA; LS-C482667-  
237 200). On the following day, membranes were washed and incubated with the goat anti-rabbit IgG HRP-  
238 labeled secondary antibody (PerkinElmer, Waltham, MA, USA; NEF812001EA) for 1 h at room  
239 temperature. Band intensity was measured using the ChemiDoc MP System (Bio-Rad).

## 240 ABPP/western blot for MAGL activity in neurovascular cells

241 Mouse (pMBMECs, primary astrocytes and pericytes) and human (hCMEC/D3 cells, primary astrocytes  
242 and pericytes) NVU cells were grown to confluence before dissociation with TrypLE and centrifugation.  
243 Cell pellets were resuspended in ABPP lysis buffer on ice for 30 min, and were vortexed until lysis was  
244 complete. Cell lysates (20  $\mu$ g) were incubated for 25 mins with 0.5  $\mu$ L of the 5  $\mu$ M MAGL-specific  
245 fluorescent probe, and 10  $\mu$ g of each lysate was loaded onto a NuPAGE 10% Bis-Tris gel for in-gel  
246 fluorescence and western blot analysis as described above.

## 247 ABPP/western blot for MAGL activity in mouse cortical lysates

248 Brain homogenates were prepared from one cerebral hemisphere as described above and the lysis  
249 supernatant was collected for ABPP and western blot analysis as described above. In each case, the total  
250 protein content of the sample was measured using a BCA assay. MAGL activity probe bands and MAGL  
251 protein intensity bands were quantified using ImageLab (Bio-Rad). TAMRA-FP selectivity studies were  
252 normalized to Coomassie Brilliant Blue band intensity. All other western blots were normalized to  $\beta$ -actin  
253 protein band intensity.

## 254 LC-MS assessment of mouse brain lysates

255 Deep frozen mouse brains were placed into 7 ml Precellys vials prefilled with ceramic homogenization  
256 beads (Bertin Instruments, P000940-LYSKO) and homogenized in methanol using a Precellys Evolution  
257 Homogenizer (Bertin Instruments) at 3 x 10 s, 6000rpm giving a final concentration of 100 mg brain/ml  
258 methanol. Samples were cleaned up by protein precipitation and aliquots were diluted 1:2 with  
259 methanol containing internal standards. Undiluted precipitates were used to measure AEA, PGE<sub>2</sub> and  
260 PGD<sub>2</sub> levels, whereas precipitates were diluted 1:100 to measure 2-AG and arachidonic acid (in each case

261 2  $\mu$ L of each sample was injected). Calibration samples were prepared by spiking the pooled brain  
262 precipitate with 10-fold concentrated calibration standards serially diluted in methanol. The internal  
263 standards for arachidonic acid, 2-AG, AEA, PGE<sub>2</sub> and PGD<sub>2</sub> were AA-d8, 2-AG-d5, AEA-d8, PGE<sub>2</sub>-d4 or  
264 PGD<sub>2</sub>-d9, respectively (all from Cayman Chemicals, Ann Arbor, MI, USA). Calibration was achieved by  
265 linear regression with weighting 1/y and excluding zero. Absolute sample concentrations were calculated  
266 by dividing the peak area ratio analyte/internal standard by the slope of the calibration curve.

## 267 LC-MS assessment for primary cell lysates

268 Cell pellets and supernatants stored at  $-80^{\circ}\text{C}$  were resuspended in 50  $\mu$ L distilled water, briefly vortexed  
269 and sonicated for 15 min, before adding 100  $\mu$ L methanol and repeating the vortex and sonication steps.  
270 The samples were then centrifuged at 18,000  $\times$  g for 10 min to precipitate the protein. The clean  
271 precipitate was diluted 1:2 with methanol containing internal standards and 2  $\mu$ L of each sample was  
272 directly injected for analysis. Cell supernatants were diluted 1:2 with methanol containing internal  
273 standards and vortexed briefly before 2  $\mu$ L of each sample was directly injected for analysis. Calibration  
274 samples were prepared for every tissue by spiking cell precipitates or supernatants with 5-fold  
275 concentrated calibration standards in methanol.

## 276 In situ hybridization

277 Control human brain cortical tissue in paraffin blocks was sourced from an in-house tissue repository.  
278 Mouse brain cortical tissue was obtained from CD-1 mice not exposed to any treatment. Brains were  
279 removed from freshly euthanized mice and placed in 10% formalin at  $4^{\circ}\text{C}$  for 24 h before embedding in  
280 paraffin blocks and preparing 4- $\mu$ m tissue sections using a microtome (Leica Microsystems, Wetzlar,  
281 Germany). We detected *MAGL* mRNA *in situ* using the RNAscope 2.5 Assay for Ventana Discovery Ultra  
282 system (ACD Bio, Minneapolis, MN, USA) and the RNAscope VS Universal HRP Reagent Kit (Red) (ACD  
283 Bio; 323250). Mounted tissue sections were incubated with citrate-based RNAscope 2.5 vs Target  
284 Retrieval buffer, pH 6.0 (ACD Bio; 322221), and then heated to  $97^{\circ}\text{C}$  for 30 min before treatment with  
285 RNAscope 2.5 vs mRNA pretreat 3-Protease (ACD Bio; 322218) at  $37^{\circ}\text{C}$  for 16 min. The human  
286 (RNAscope 2.5 VS Probe-Hs-MGLL; ACD Bio; 539159) and mouse (RNAscope 2.5 VS Probe-Mm-Mgll; ACD  
287 Bio; 478839) *MAGL* probes were then hybridized on the tissue for 60 min. To ensure tissue RNA integrity,  
288 a *UBC* positive control probe was used for human (RNAscope 2.5 VS Positive Control Probe-Hs-UBC; ACD  
289 Bio; 312029) and mouse (RNAscope 2.5 VS Positive Control Probe-Mm-Ubc; ACD Bio; 310779)  
290 specimens. A *dapB* negative control probe (RNAscope 2.5 VS Negative Control Probe\_dapB; ACD Bio;  
291 312039) corresponding to a bacterial gene not present in most mammalian tissue, was used for both  
292 species.

## 293 Statistical analysis

294 GraphPad Prism v8.0 (GraphPad Software, La Jolla, CA, USA) was used for all statistical analysis.  
295 Statistical tests were used for each data set as indicated in the figure legends and all data are presented  
296 as means  $\pm$  standard deviations (SD) with asterisks to indicate significant differences (ns = not significant,  
297 \* $p < 0.05$ , \*\* $p < 0.01$ , \*\*\* $p < 0.001$ , \*\*\*\* $p < 0.0001$ ).

298



## 299 RESULTS

### 300 MAGLi 432 selectivity and potency in human and mouse brain lysates

301 MAGLi 432 [33] (**Fig. 1a**) is a non-covalent MAGL inhibitor that binds to the human (**Fig. 1b**) and mouse  
302 (not shown) MAGL enzymes. It binds with high affinity to the MAGL active site, with  $IC_{50}$  values of 4.2 nM  
303 for the human enzyme and 3.1 nM for the mouse enzyme as observed in enzymatic assays [33]. To  
304 investigate the selectivity and target occupancy of MAGLi 432 in mouse and human brain lysates, we  
305 carried out competitive activity based protein profiling (ABPP) with DMSO (control), 10  $\mu$ M MAGLi 432 or  
306 10  $\mu$ M of the established covalent MAGL inhibitor JZL 184 ( $IC_{50}$  = 8.1 and 2.9 nM for human and mouse  
307 MAGL, respectively) (7,12). The lysates were then incubated with TAMRA-FP, a fluorophosphonate probe  
308 that binds irreversibly to serine residues in the MAGL active site, thus revealing whether MAGLi 432  
309 selectively engages with MAGL by competitively inhibiting TAMRA-FP binding (**Fig. 1c,f**). Competitive  
310 ABPP was also carried out with a MAGL-specific probe [41] under the same conditions (DMSO, MAGLi  
311 432 and JZL 184) to determine the specificity of MAGLi 432 for MAGL (**Fig. 1c-h**). In both experiments, we  
312 observed the almost complete absence of TAMRA-FP and MAGL probe fluorescent bands at ~33 and ~35  
313 kDa in human (**Fig. 1c-e**) and mouse (**Fig. 1f-h**) lysates treated with MAGLi 432, suggesting that MAGLi  
314 432 achieves an effective blockade of active MAGL. Significantly, MAGLi 432 selectively blocked binding  
315 of TAMRA-FP to MAGL but not to the active sites of other serine hydrolases. In contrast, JZL 184 only  
316 partially inhibited MAGL (83% and 78% decreases in human and mouse, respectively) compared to 100%  
317 inhibition for MAGLi 432, in all cases relative to the DMSO control. We also observed the non-specific  
318 binding of JZL 184 in mouse brain lysates revealed by non-specific signal inhibition at ~80 kDa (**Fig. 1f**).  
319 Normalized band intensities from both probes in human (**Fig. 1d,e**) and mouse (**Fig. 1g,h**) brain lysates  
320 were normalized to the total protein signal (**Fig. S1**). Overall, these results suggest that MAGLi 432  
321 displays selectivity for MAGL over other serine hydrolases, in contrast to the irreversible inhibitor JZL  
322 184.

323 **Figure 1. MAGLi 432 blocks MAGL in human and mouse brain lysates in a selective and potent manner.**  
324 **(A)** Chemical structure of MAGLi 432 with an  $IC_{50}$  = 4.2 nM in human MAGL as determined by enzymatic  
325 assays. **(B)** X-ray co-crystal structure of MAGLi 432 (cyan) with human MAGL (blue). View of the active  
326 site of human MAGL (blue) reveals a non-covalent binding of the inhibitor. Interactions of MAGLi 432  
327 with the catalytic Ser122 are mediated through the amide carbonyl group via a water molecule located  
328 in the oxyanion hole. Hydrogen bonds are depicted as yellow dashed lines. Selective MAGL inhibition by  
329 MAGLi 432 in human **(C-E)** and mouse **(F-H)** brain lysates was determined by competitive activity based  
330 protein profiling (ABPP). Brain lysates were incubated with DMSO, 10  $\mu$ M MAGLi 432 or 10  $\mu$ M JZL 184  
331 and then with either a broad serine hydrolase activity-based probe (TAMRA-FP, green) or the MAGL-  
332 specific probe (red) before samples were loaded on a gel. Green fluorescent bands reveal serine  
333 hydrolases not inhibited by MAGLi 432. Red fluorescent bands reveal active MAGL not blocked by MAGLi  
334 432. The normalized signal intensity was quantified as the average signal intensity for each MAGL  
335 fluorescent band (green or red) divided by the total protein signal intensity (Coomassie Brilliant Blue  
336 staining, **Fig. S1**) in human **(D,E)** and mouse **(G,H)** brain lysates ( $n = 2$ ). **(I-L)** Assessment of MAGL potency  
337 was measured by competitive ABPP after incubation with ascending doses of MAGLi 432 in human **(I)**  
338 and mouse brain lysates **(J)** followed by incubation with the MAGL-specific probe. **(K, L)** The average  
339 signal intensities of active MAGL and total MAGL protein in human **(K)** and mouse **(L)** brain lysates were

340 quantified as the total detectable active MAGL signal (ABPP) divided by the total the MAGL protein/ $\beta$ -  
341 actin signal (n = 2).

342

343 We determined the potency of MAGLi 432 by competitive ABPP in human and mouse brain lysates  
344 treated with ascending doses of the inhibitor (10 nM, 100 nM, 1  $\mu$ M and 10 $\mu$ M), followed by incubation  
345 with the MAGL-specific ABPP probe. MAGLi 432 engaged MAGL in a dose-dependent, equipotent  
346 manner (**Fig. S2**), with an IC<sub>50</sub> of 1–10 nM and complete inhibition at 100 nM in human (**Fig 1i,k**) and  
347 mouse (**Fig 1j,l**) brain lysates. These data confirm that MAGLi 432 is a highly selective, potent MAGL  
348 inhibitor (superior to JZL 184) that can occupy and engage with the human and mouse enzymes.

## 349 **MAGL is expressed and active in human and mouse brain tissue and NVU cells**

350 Next we investigated the expression and activity of MAGL in the cortical regions of the brain, which  
351 feature the highest density of brain capillaries and NVU (43). *MAGL* mRNA expression was confirmed by  
352 *in situ* hybridization using a *MAGL*-specific probe on human and mouse cortical tissue slices (**Fig. 2a**).  
353 *MAGL* mRNA was broadly distributed across cortical tissue cells and its perinuclear arrangement  
354 suggested a cytoplasmic localization. In terms of cell-specific expression in the neurovasculature, *MAGL*  
355 mRNA was detected in close proximity to, but not directly co-localized with CD31<sup>+</sup> endothelial cells,  
356 suggesting that MAGL may be expressed in closely associated mural cells, astrocytes and pericytes, which  
357 envelop BMECs within the vascular barrier.

358 **Figure 2. MAGL is expressed in the human and mouse cortex and is active at the level of the NVU**  
359 **(endothelial cells, astrocytes and pericytes).** (A) Confirmation of *MAGL* mRNA expression by *in situ*  
360 hybridization (RNAScope) in human and mouse cortical brain tissue sections. Representative images  
361 show human and mouse brain cortical sections hybridized with *MAGL* RNAScope probes, then treated  
362 with chromogenic Fast Red substrate used for the detection of *UBC* (positive control for RNA integrity),  
363 *dapB* (negative control) and *MAGL* mRNA. Tissue sections counterstained with hematoxylin (n = 2). Scale  
364 bar = 20  $\mu$ m. *MAGL* mRNA is expressed in close proximity to but does not co-localize with endothelial  
365 cells. (B) Immunofluorescence of mouse brain tissue sections (previously hybridized with *MAGL* mRNA)  
366 stained with an anti-CD31 antibody (green) to label endothelial cells (n = 2). Scale bar = 20  $\mu$ m. MAGL is  
367 expressed and active in NVU cells. Human (C-E) and mouse (F-H) BMECs (hCMEC/D3 or pMBMEC),  
368 primary astrocytes (pHA or pMA) and primary pericytes (pHP or pMP) were used to assess *MAGL*  
369 expression within the NVU. Relative *MAGL* gene expression levels in human (C) and mouse (F) NVU cells  
370 measured by droplet digital qRT-PCR. Relative *MAGL* gene expression is normalized to housekeeping  
371 gene *EMC7* (n = 3, mean  $\pm$  SD, one-way ANOVA with Tukey's *post hoc* test, ns = not significant, \*p < 0.05,  
372 \*\*p < 0.01, \*\*\*p < 0.001, \*\*\*\*p < 0.0001). MAGL activity (ABPP) and total MAGL protein (western blot)  
373 in human (D, E) and mouse (G, H) NVU cells. Active MAGL was quantified as the average intensity of the  
374 total detectable MAGL signal divided by total MAGL protein/ $\beta$ -actin signal (n = 2, mean  $\pm$  SD, one-way  
375 ANOVA with Tukey's *post hoc* test, ns = not significant, \*p < 0.05, \*\*p < 0.01, \*\*\*p < 0.001, \*\*\*\*p <  
376 0.0001).

377 To confirm these findings, we profiled *MAGL* expression in human and mouse NVU cells *in vitro*,  
378 including human primary astrocytes and pericytes and hCMEC/D3 BMECs, as well as mouse pMBMECs,  
379 primary astrocytes and primary pericytes. *MAGL* gene expression was assessed by droplet digital qRT-  
380 PCR and *MAGL* protein expression was assessed by ABPP and western blot (**Fig. 2c-h**). *MAGL* gene

381 expression correlated with MAGL protein expression in each cell type. The analysis of human NVU cells  
382 (**Fig. 2c**) revealed that primary pericytes expressed the highest levels of MAGL, followed by BMECs and  
383 primary astrocytes (**Fig. 2c-e, Fig. S3a,c**). In contrast, whereas primary pericytes also exhibited the  
384 highest *MAGL* expression levels among mouse NVU cells, astrocytes were next, with pMBMECs  
385 accumulating little to no detectable MAGL (**Fig. 2f-h, Fig. S3b, d**). We concluded that *MAGL* is expressed  
386 in the mouse and human brain cortex and at the level of the NVU cells, and showed for the first time that  
387 pericytes express the highest levels of *MAGL* mRNA and MAGL protein in the NVU.

### 388 **MAGLi 432 triggers the robust elevation of 2-AG levels in human NVU cells**

389 Having demonstrated an efficient blockade of MAGL activity in brain lysates using MAGLi 432, we next  
390 investigated the efficacy of MAGLi 432 *in vitro* by dose-dependent competitive ABPP on human BMECs  
391 (hCMEC/D3) as well as primary human astrocytes and pericytes. Cells were treated with increasing doses  
392 of MAGLi 432 (10 nM, 100 nM, 1  $\mu$ M and 10  $\mu$ M) or DMSO (solvent control) for 6 h. ABPP showed  
393 effective MAGL target occupancy (**Fig. 3a-b, Figs S4 and S5**) with *in vitro* IC<sub>50</sub> values < 10 nM.  
394 Unsurprisingly, a slightly higher concentration of MAGLi 432 was required to fully block active MAGL in  
395 pericytes given these showed the highest level of expression among NVU cells. These results confirmed  
396 the *in vitro* potency of MAGLi 432 and revealed that 1  $\mu$ M is an effective *in vitro* concentration for MAGL  
397 inhibition studies.

#### 398 **Figure 3. MAGLi 432 inhibits MAGL activity and robustly enhances 2-AG levels in human NVU cells.**

399 **(A)** Dose-dependent inhibition of active MAGL by MAGLi 432 in human BMECs (hCMEC/D3), astrocytes  
400 (pHA) and pericytes (pHP) *in vitro* assessed by ABPP and western blot applied to cell lysates 6 h after  
401 exposure to ascending doses of MAGLi 432 (10 nM, 100 nM, 1  $\mu$ M and 10  $\mu$ M) or DMSO. **(B)** The average  
402 signal intensities of MAGL activity and total protein were quantified as the total detectable active MAGL  
403 signal (ABPP) divided by the total MAGL/ $\beta$ -actin signal, with the highest signal normalized to 100%. **(C-D)**  
404 Assessment of a functional blockade of MAGL by MAGLi 432 in BMECs, astrocytes and pericytes *in vitro*  
405 by ABPP and western blot applied to cell lysates 6 h after exposure to DMSO or 1  $\mu$ M MAGLi 432. The  
406 average signal intensities of MAGL activity and total protein were quantified as the total detectable  
407 active MAGL signal (ABPP) divided by the total MAGL/ $\beta$ -actin signal. **(E,F)** LC-MS measurement of 2-AG  
408 **(C)** and arachidonic acid (AA) **(D)** levels in cell lysates after treatment for 6 h (DMSO or 1 $\mu$ M MAGLi 432).  
409 Data are means  $\pm$  SD, one-way ANOVA (ns = not significant, \*p < 0.05, \*\*p < 0.01, \*\*\*p < 0.001, \*\*\*\*p <  
410 0.0001).

411 Given these findings, we investigated whether MAGLi 432 modulates the 2-AG/arachidonic acid axis *in*  
412 *vitro* by treating hMCEC/D3 cells as well as primary human astrocytes and pericytes with 1  $\mu$ M MAGLi  
413 432 or DMSO (solvent control) for 6 h. Again, target occupancy was measured by ABPP/western blot, and  
414 target engagement (via 2-AG/arachidonic acid modulation) was measured by LC-MS. ABPP showed that  
415 MAGLi 432 effectively blocked active MAGL, reducing it to undetectable levels in all cell types compared  
416 to the DMSO control (**Fig. 3c-d**). Target engagement studies revealed that MAGLi 432 increased 2-AG  
417 levels in all cell types (**Fig. 3e**), with the greatest effect (~70-fold increase) in pericytes but also an  
418 ~18-fold increase in BMECs and astrocytes. Interestingly, MAGLi 432 modulated arachidonic acid levels in  
419 a cell specific-manner, with no effect in BMECs, but significant depletion in astrocytes and pericytes (**Fig.**  
420 **3f**). These data show that MAGLi 432 can modulate 2-AG levels in all cells, whereas the effect on

421 arachidonic acid is cell-specific, suggesting that 2-AG and MAGL activity do not regulate arachidonic acid  
422 production *in vitro* in BMECs.

423 Next, we investigated whether inflammatory stimuli affect MAGL expression and activity in NVU cells. LPS  
424 administration leads to a significant increase in brain PGE<sub>2</sub> levels *in vivo* [42], so we considered whether  
425 LPS could change the 2-AG/arachidonic acid balance in NVU cells in a MAGL-dependent manner. We  
426 treated BMECs, astrocytes and pericytes with LPS or HBSS (the LPS solvent) for 6 h, then measured MAGL  
427 expression by ABPP/western blot (**Fig. 4a,b**) and the modulation of 2-AG/arachidonic acid by LC-MS (**Fig.**  
428 **4c,d**). The stimulation of BMECs with LPS did not alter MAGL expression. However, 50 and 100 ng LPS  
429 reduced the levels of active (**Fig. 4b**) and total MAGL (**Fig. S6b**) in astrocytes. Conversely, LPS increased the  
430 levels of both active (**Fig. 4b, Fig. S6a**) and total (**Fig. S6b**) MAGL in pericytes. Despite the changes in MAGL  
431 expression and activity in astrocytes and pericytes, LPS did not alter the cellular levels of 2-AG. However,  
432 arachidonic acid levels increased in response to 100 ng LPS in hCMEC/D3 cells and pericytes, and in  
433 response to 50 ng LPS in hCMEC/D3 cells, suggesting that 2-AG may not be the main source of arachidonic  
434 acid in those cells during inflammation. LPS significantly reduced arachidonic acid levels in astrocytes  
435 compared to the HBSS control, showing that LPS only induces the depletion of arachidonic acid in  
436 astrocytes.

437 **Figure 4. LPS does not modulate 2-AG in human NVU cells, but differentially regulates arachidonic acid**  
438 **levels in a cell-specific manner. (A-B)** *In vitro* effects of LPS on active and total MAGL expression in  
439 BMECs as well as primary human astrocytes (pHA) and pericytes (pHP). **(A)** NVU cells incubated with  
440 HBSS (solvent) or 50 or 100 ng LPS for 6 h followed by ABPP and western blot applied to the cell lysates.  
441 **(B)** The average signal intensities of MAGL activity and total protein were quantified as the total  
442 detectable active MAGL signal (ABPP) divided by the total MAGL/ $\beta$ -actin signal. **(C, D)** LC-MS analysis of  
443 2-AG **(C)** and arachidonic acid **(D)** levels in cell lysates after treatment for 6 h (HBSS or 50 or 100 ng LPS).  
444 Data are means  $\pm$  SD, one-way ANOVA (ns = not significant, \* $p$  < 0.05, \*\* $p$  < 0.01, \*\*\* $p$  < 0.001, \*\*\*\* $p$  <  
445 0.0001).

## 446 **MAGLi 432 achieves target occupancy and target engagement in a mouse model of** 447 **LPS-induced neuroinflammation**

448 Inhibiting 2-AG hydrolysis in the brain after injury or inflammation can limit the accumulation of  
449 arachidonic acid and thus restrict prostaglandin production. To investigate the ability of MAGLi 432 to  
450 achieve this effect *in vivo*, male CD-1 mice were randomized into three treatment groups (NaCl + vehicle,  
451 LPS + MAGLi 432 and LPS + vehicle) and were treated on 3 consecutive days with either NaCl or 1 mg/kg  
452 LPS, followed by either a vehicle solution or 1 mg/kg MAGLi 432 after a further 30 min (**Fig. 5a**). The  
453 assessment of cortical brain homogenates by ABPP and western blot revealed that a 1 mg/kg dosing  
454 regimen is sufficient to target MAGL activity, reducing it to almost undetectable levels (**Fig. 5b-c**). We  
455 also found that blocking active MAGL does not alter total MAGL protein expression in the brain and that  
456 LPS-induced inflammation does not modify active or total MAGL protein expression under our  
457 experimental conditions (**Fig. 3b-c**).

458 **Figure 5. Target occupancy and engagement assays show that MAGLi 432 potently reduces MAGL**  
459 **activity in a mouse model of LPS-induced neuroinflammation. (A)** Treatment groups and injection  
460 schedule of LPS and MAGLi 432. CD-1 mice were challenged with LPS or NaCl followed by MAGLi 432 or  
461 vehicle (i.p. administration over 3 consecutive days). Blood and brain tissue were collected for analysis.

462 **(B,C)** ABPP and western blot analysis of cortical brain lysates from each treatment group reveal that  
463 MAGLi 432 achieves an effective blockade in the brain (n = 6). **(C)** The average signal intensities of MAGL  
464 activity and total protein were quantified as the total detectable active MAGL signal (ABPP) divided by  
465 the total MAGL/ $\beta$ -actin signal. **(D)** LC-MS analysis of 2-AG, arachidonic acid, PGE<sub>2</sub>, PGD<sub>2</sub> and AEA in  
466 cortical lysates of each treatment group (n = 3). Data are means  $\pm$  SD, one-way ANOVA with Tukey's *post*  
467 *hoc* test, ns = not significant, \*p < 0.05, \*\*p < 0.01, \*\*\*p < 0.001, \*\*\*\*p < 0.0001).

468 We then used LC-MS to assess target engagement on brain cortical tissue to determine the levels of  
469 2-AG, arachidonic acid, PGE<sub>2</sub>, PGD<sub>2</sub> and AEA (**Fig. 5d**). Mice receiving MAGLi 432 accumulated ~10-fold  
470 more 2-AG than vehicle controls (mean increase = ~70 pmol/mg 2-AG in the LPS + MAGLi 432 treated  
471 group vs. 7–8.5 pmol/mg in the NaCl + vehicle and LPS + vehicle groups). Therefore, LPS alone had no  
472 significant effects on 2-AG. Arachidonic acid levels were significantly lower in both LPS-treated groups  
473 (**Fig. 5d**) along with a concomitant increase in PGE<sub>2</sub> levels. MAGLi 432 achieved the greatest reduction in  
474 LPS-induced PGE<sub>2</sub> but not significantly compared to the LPS control group. Neither PDG<sub>2</sub> nor AEA was  
475 modulated in any of the treatment groups, supporting the specificity of MAGLi 432 for MAGL over FAAH  
476 (**Fig. 5d**). Collectively, these data confirm that MAGLi 432 engages MAGL in the brain, suggesting that  
477 MAGL inhibition reduces arachidonic acid and PGE<sub>2</sub> levels in our subchronic LPS paradigm.

478 MAGL inhibition and the depletion of arachidonic acid pools in the brain following inflammation or injury  
479 can reduce the abundance of pro-inflammatory cytokines such as IL-6 and IL-1 $\beta$  [13,43].  
480 Endocannabinoid signaling has also been shown to favorably modulate BBB permeability brought on by  
481 systemic LPS-administration [13] and 2-AG accumulates after traumatic brain injury (10), so we  
482 investigated whether 2-AG accumulation and the proposed anti-inflammatory effects of MAGL inhibition  
483 prevent leakage through the BBB in our 3-day LPS model. On the third day of LPS administration, a  
484 70-kDa FITC dextran tracer was administered intravenously 15 min before euthanization to trace vascular  
485 leakage into the brain parenchyma. Brain cortical tissue from mice in each group was collected and  
486 stained with a CD31-specific antibody to label the endothelial cells (**Fig. 6a**). Examination of the tissue  
487 revealed intravascular confinement of the dextran tracer in the untreated mice (vascular co-localization)  
488 but the extravasation of dextran in both LPS-treated groups (**Fig. 6a**). MAGLi 432 therefore does not  
489 prevent LPS-induced leakage of the 70-kDa tracers into the brain parenchyma.

490 **Figure 6. MAGLi 432 treatment after LPS challenge does not reduce BBB permeability and**  
491 **inflammatory cytokine expression in the cortex. (A)** Immunofluorescence micrographs of 100- $\mu$ m  
492 cortical sections from mice (n = 6) injected with 70-kDa FITC-dextran following LPS challenge and  
493 treatment (**Fig. 3A**) stained with an anti-CD31 (PECAM-1) antibody (orange) to label blood vessels and  
494 DAPI as a nuclear stain (blue). The experiment revealed no decrease in vascular permeability after  
495 exposure to MAGLi 432 compared to the LPS-only group (scale bar = 20  $\mu$ m). **(B)** Assessment of vascular  
496 permeability by measuring fibrinogen extravasation in plasma and cortical brain lysates (n = 6,  
497 normalization to total protein determined with a BCA assay). **(C)** Relative expression of *IL-6*, *IL-1 $\beta$* , *LCN2*  
498 and *TNF* genes assessed by droplet digital qRT-PCR. Gene expression was normalized to absolute gene  
499 expression levels per sample. Values represent results from two separate experiments. One-way ANOVA  
500 was used to compare the mean of each treatment group with the mean of every other group (n = 6, ns =  
501 not significant, \*p < 0.1, \*\*p < 0.01, \*\*\*p < 0.001, \*\*\*\*p < 0.00001).

502 We also measured the permeability of the BBB to fibrinogen, a 340-kDa blood-borne acute phase  
503 protein, by detecting it in the brain parenchyma. Fibrinogen is strongly upregulated in the circulation

504 during inflammation and exacerbates inflammatory cascades following its extravasation across a  
505 disrupted BBB (44). We measured the ratio of cortical brain fibrinogen versus plasma fibrinogen,  
506 revealing a significant increase in the brain:plasma fibrinogen ratio after 3 days of LPS treatment, which  
507 was not ameliorated by MAGLi 432 (**Fig. 6b**). This confirms that MAGL inhibition does not prevent  
508 LPS-induced BBB permeability under our experimental conditions.

509 Finally, we determined the effects of our multi-dose LPS challenge on the inflammatory cytokine  
510 response in cortical brain lysates by droplet digital qRT-PCR. MAGLi 432 did not reduce the production of  
511 the pro-inflammatory cytokines IL-1 $\beta$  and IL-6 in response to LPS (**Fig. 6c**). Conversely, MAGLi 432  
512 significantly increased LCN2 and TNF expression compared to the LPS treatment (**Fig. 6c**).

513 Taken together, our results suggest that MAGLi 432 neither prevented LPS-induced BBB permeability nor  
514 modulated the LPS-induced pro-inflammatory cytokine response in the LPS paradigm we used, despite  
515 robust MAGL target engagement and the accumulation of more 2-AG in the brain.

## 516 DISCUSSION

517 In this study, we have shown that MAGLi 432 is a reversible, highly potent and selective MAGL inhibitor  
518 that can penetrate the brain *in vivo*. MAGL inhibitors have been developed for the therapeutic  
519 management of pain, movement disorders, and neurodegenerative diseases, involving mechanisms such  
520 as stimulating 2-AG production or limiting the expression of PGE<sub>2</sub> and pro-inflammatory cytokines  
521 [11,13,44–46]. We focused on the characterization of MAGLi 432 and its ability to inhibit MAGL *in vivo*,  
522 its effect on LPS-induced BBB permeability, and its impact on NVU cells *in vitro*.

523 We found that MAGLi 432 is active against both human and mouse MAGL. The IC<sub>50</sub> against human MAGL  
524 was 4.2 nM, comparable to that of irreversible inhibitors such as JZL 184 (IC<sub>50</sub> = 8 nM), KLM29 (IC<sub>50</sub> = 2.5  
525 nM) and MJN110 (IC<sub>50</sub> = 2.1 nM) [26]. The dose-dependent inhibition of MAGL activity without effects on  
526 MAGL protein levels was observed *in vitro* in pericytes, BMECs, and astrocytes, *ex vivo* in brain tissue  
527 homogenates, and *in vivo* in mouse brains. Only a few reversible MAGL inhibitors have been reported  
528 thus far, and MAGLi 432 may therefore have profound clinical implications. Specifically, the  
529 administration of irreversible inhibitors is associated with prolonged 2-AG elevation and the  
530 desensitization of CB receptors [29,47]. In contrast, reversible inhibitors should help to identify a  
531 therapeutic window of 2-AG elevation that elicits anti-inflammatory effects without CB receptor  
532 tolerance.

533 The high selectivity of MAGLi 432 for the active site of MAGL may also improve clinical outcomes by  
534 conferring a favorable safety profile. The selectivity of MAGLi 432 is not matched by the irreversible  
535 inhibitor JZL 184, as confirmed in our competitive ABPP experiments with the TAMRA-FP probe and a  
536 MAGL-specific probe. Furthermore, MAGLi 432 did not modify AEA levels in mouse brains *in vivo*,  
537 suggesting it does not inhibit FAAH (**Ref**). Irreversible MAGL inhibitors often lack selectivity, partially  
538 inhibiting FAAH, ABDH6 and ABDH12 and thus leading to off-target effects that hamper clinical  
539 development [27,48,49]. The importance of high selectivity was highlighted in a recent clinical phase I  
540 study of the FAAH inhibitor BIA 10-2474, which led to neurotoxicity that was fatal in one participant.  
541 ABPP selectivity assessment in human colon carcinoma cells revealed the binding of several additional  
542 serine hydrolases, which may have contributed to the reported adverse events [32,50].

543 The investigation of cell-specific MAGL expression and pharmacological modulation have often focused  
544 on CNS neurons and glial cells, with the neurovasculature receiving little attention [12,23,27,30,51–53].  
545 We showed for the first time that MAGL is expressed in the microvasculature and in cells of the NVU.  
546 Cultured human and mouse brain microvascular endothelial cells, astrocytes and pericytes express  
547 MAGL, although pericytes are the predominant source of MAGL at the level of the neurovasculature.  
548 Accordingly, the inhibition of MAGL in pericytes may contribute most to therapeutic elevation of 2-AG  
549 levels in the brain, conferring neuroprotective functions including neurovascular integrity. Bulk RNA-Seq  
550 datasets often exclude mural cells from tissue extracts before sequencing, or their expression profiles  
551 are sequestered into broader cell groups, making it difficult to deduce their specific expression profiles.  
552 However, recent RNA-Seq datasets have begun to include these cells and their subsets, supporting our  
553 findings [54].

554 We then investigated the impact of MAGL inhibition on the levels of 2-AG and arachidonic acid,  
555 revealing a cell type-specific functional role. Specifically, we found that MAGL controls the 2-  
556 AG/arachidonic acid ratio in human peripheral astrocytes and pericytes, based on the observation that  
557 MAGLi 432 specifically raised 2-AG levels and slightly reduced arachidonic acid levels in these cells.  
558 However, MAGL inhibition in endothelial cells leads to a significant increase in 2-AG levels with no impact  
559 on arachidonic acid, suggesting that MAGL is not the main enzyme responsible for arachidonic acid  
560 production in these cells. In peripheral tissues, PLA<sub>2</sub> is the main enzyme responsible for most arachidonic  
561 acid production and it may also play this role in brain microvascular endothelial cells. Indeed, the  
562 accumulation of arachidonic acid due to PLA<sub>2</sub> activity in human brain endothelial cells and mouse models  
563 of vascular neuroinflammation has already been described [55,56].

564 The protective role of 2-AG helps to preserve BBB integrity following exposure to acute or chronic  
565 inflammatory insults [13,57]. We therefore sought to determine whether (i) inflammatory stimuli  
566 modulate MAGL expression and/or activity *in vivo* and (ii) MAGL inhibition could dampen LPS-induced  
567 BBB permeability and the production of pro-inflammatory cytokines. We observed no changes in active  
568 or total MAGL protein expression either *in vitro* or *in vivo* in response to LPS, indicating that MAGL  
569 expression is not modulated under inflammatory conditions in human NVU cells or in the mouse brain.  
570 Furthermore, multiple LPS doses over 3 days did not affect the abundance of total or active MAGL  
571 protein in the CNS. Although MAGL target engagement in the brain was significant, the inhibition of  
572 MAGL did not prevent LPS-induced BBB permeability. This was confirmed by the extravasation of  
573 high-molecular weight dextrans and fibrinogen into the brain parenchyma. Furthermore, the expression  
574 of key neuroinflammatory mediators, including IL-1 $\beta$ , IL-6, LCN2 and TNF, was either unaffected or even  
575 induced following the inhibition of MAGL.

576 Taken together, our data show that MAGLi 432 lacks anti-inflammatory effects in our experimental  
577 setting, which contrasts with multiple earlier studies reporting the *in vivo* anti-inflammatory effects of  
578 MAGL inhibition following a brain insult [10,11,13,45]. However, most of these studies involved  
579 irreversible inhibitors that lacked selectivity in models of acute inflammation. The binding and inhibition  
580 of additional endocannabinoid hydrolases such as FAAH and/or ABHD6/12 could achieve the observed  
581 protective effects by limiting the accumulation of agents that trigger 2-AG hydrolysis or the formation of  
582 arachidonic acid pools. Conversely, repetitive LPS injections may have created a hyper-inflammatory  
583 environment that is not representative of physiological inflammatory states. LPS is known to boost COX2  
584 expression in the brain [58–60]. Although COX2 converts arachidonic acid into downstream

585 prostaglandins, it can also directly oxidize 2-AG into prostaglandin glycerol esters, which are rapidly  
586 hydrolyzed into PGE<sub>2</sub> or act directly on P2Y6 purinergic receptors [61–64]. These receptors are strongly  
587 upregulated in the vascular endothelium in the presence of LPS and increase the expression of  
588 pro-inflammatory cytokines and cell adhesion molecules [65,66]. Although MAGL inhibition can deplete  
589 pools of arachidonic acid and thus limit prostaglandin production, the LPS-related increase of COX-2 is  
590 not directly modulated by MAGL inhibitors and therefore does not ameliorate COX2 inflammatory  
591 pathways. Furthermore, cytokine expression is dynamic at the BBB, therefore snapshot measurements of  
592 may limit the scope of inflammatory modulation and determine when and where MAGL inhibition can be  
593 most effective in the restoration of vascular integrity.

## 594 CONCLUSION

595 We have shown that the reversible inhibitor MAGLi 432 displays high selectivity and potency towards  
596 mouse and human MAGL. We observed the differential expression of MAGL in NVU cells and highlighted  
597 its relevance for the cell-specific production of arachidonic acid, which should lead to further  
598 investigations focusing on the role of MAGL in neurovascular insults. In future studies, more clinically  
599 relevant disease models involving dysregulated brain microvasculature should be used to investigate the  
600 effects of MAGL inhibition. For example, mouse models recapitulating disease pathology of AD (ex:  
601 APP/PS1 transgenic mice)[67] or of MS (experimental autoimmune encephalomyelitis (EAE) mice) also  
602 develop dysregulation of the BBB due to disease-related inflammation[68]. Given the known  
603 neuroprotective role of 2-AG, our results suggest that NVU cells can produce beneficial levels of 2-AG,  
604 leading to the accumulation of protective secretory factors even during inflammation. Therefore, future  
605 studies with MAGLi 432 should investigate neuroprotective effects and different therapeutic dosing  
606 frequencies in acute and chronic preclinical models of neuroinflammation and vascular permeability.  
607 Experiments involving neurovascular cells derived from human induced pluripotent stem cells as well as  
608 3D perfusable neurovascular models could provide further insights into the effects of MAGL  
609 pharmacological intervention on cell-cell dynamics within the NVU.

610

## 611 ACKNOWLEDGEMENTS

612 We would like to thank Marie-Therese Miss for assistance with in vivo experiments, Agnes Nilly and  
613 Heinz Gutweiller for ordering and preparation of compound solutions for in vivo injections. Additionally,  
614 we would like to thank Florian Mohr for his assistance with ABPP and WB studies.

615

## 616 REFERENCES

- 617 1. Di Marzo V, Piscitelli F. The Endocannabinoid System and its Modulation by Phytocannabinoids.  
618 *Neurotherapeutics*. 2015;12: 692–698. doi:10.1007/s13311-015-0374-6
- 619 2. Howlett AC, Bidaut-Russell M, Devane WA, Melvin LS, Johnson MR, Herkenham M. The  
620 cannabinoid receptor: biochemical, anatomical and behavioral characterization. *Trends in*  
621 *Neurosciences*. 1990;13: 420–423. doi:10.1016/0166-2236(90)90124-S



- 622 3. Stella N, Schweitzer P, Piomelli D. A second endogenous cannabinoid that modulates long-term  
623 potentiation. *Nature*. 1997;388: 773–778. doi:10.1038/42015
- 624 4. Long JZ, Nomura DK, Cravatt BF. Characterization of monoacylglycerol lipase inhibition reveals  
625 differences in central and peripheral endocannabinoid metabolism. *Chem Biol*. 2009;16: 744–753.  
626 doi:10.1016/j.chembiol.2009.05.009
- 627 5. Bhattacharya S, Patel R, Sen N, Quadri S, Parthasarathi K, Bhattacharya J. Dual signaling by the  
628 alpha(v)beta(3)-integrin activates cytosolic PLA(2) in bovine pulmonary artery endothelial cells. *Am*  
629 *J Physiol Lung Cell Mol Physiol*. 2001;280: L1049-1056. doi:10.1152/ajplung.2001.280.5.L1049
- 630 6. Wang B, Wu L, Chen J, Dong L, Chen C, Wen Z, et al. Metabolism pathways of arachidonic acids:  
631 mechanisms and potential therapeutic targets. *Sig Transduct Target Ther*. 2021;6: 1–30.  
632 doi:10.1038/s41392-020-00443-w
- 633 7. Viader A, Blankman JL, Zhong P, Liu X, Schlosburg JE, Joslyn CM, et al. Metabolic Interplay between  
634 Astrocytes and Neurons Regulates Endocannabinoid Action. *Cell Rep*. 2015;12: 798–808.  
635 doi:10.1016/j.celrep.2015.06.075
- 636 8. Panikashvili D, Simeonidou C, Ben-Shabat S, Hanus L, Breuer A, Mechoulam R, et al. An endogenous  
637 cannabinoid (2-AG) is neuroprotective after brain injury. *Nature*. 2001;413: 527–531.  
638 doi:10.1038/35097089
- 639 9. Panikashvili D, Shein NA, Mechoulam R, Trembovler V, Kohen R, Alexandrovich A, et al. The  
640 endocannabinoid 2-AG protects the blood-brain barrier after closed head injury and inhibits mRNA  
641 expression of proinflammatory cytokines. *Neurobiol Dis*. 2006;22: 257–264.  
642 doi:10.1016/j.nbd.2005.11.004
- 643 10. Choi S-H, Arai A, Mou Y, Kang B, Yen CC-C, Hallenbeck J, et al. Neuroprotective effects of  
644 monoacylglycerol lipase inhibitors in experimental ischemic stroke. *Stroke*. 2018;49: 718–726.  
645 doi:10.1161/STROKEAHA.117.019664
- 646 11. Kerr D, Harhen B, Okine B, Egan L, Finn D, Roche M. The monoacylglycerol lipase inhibitor JZL184  
647 attenuates LPS-induced increases in cytokine expression in the rat frontal cortex and plasma:  
648 differential mechanisms of action. *Br J Pharmacol*. 2013;169: 808–819. doi:10.1111/j.1476-  
649 5381.2012.02237.x
- 650 12. Grabner GF, Eichmann TO, Wagner B, Gao Y, Farzi A, Taschler U, et al. Deletion of Monoglyceride  
651 Lipase in Astrocytes Attenuates Lipopolysaccharide-induced Neuroinflammation \*. *Journal of*  
652 *Biological Chemistry*. 2016;291: 913–923. doi:10.1074/jbc.M115.683615
- 653 13. Piro JR, Suidan GL, Quan J, Pi Y, O'Neill SM, Ilardi M, et al. Inhibition of 2-AG hydrolysis differentially  
654 regulates blood brain barrier permeability after injury. *Journal of Neuroinflammation*. 2018;15:  
655 142. doi:10.1186/s12974-018-1166-9
- 656 14. Abbott NJ, Patabendige AAK, Dolman DEM, Yusof SR, Begley DJ. Structure and function of the  
657 blood-brain barrier. *Neurobiol Dis*. 2010;37: 13–25. doi:10.1016/j.nbd.2009.07.030
- 658 15. Keaney J, Campbell M. The dynamic blood–brain barrier. *The FEBS Journal*. 2015;282: 4067–4079.  
659 doi:10.1111/febs.13412

- 660 16. Sweeney MD, Sagare AP, Zlokovic BV. Blood–brain barrier breakdown in Alzheimer disease and  
661 other neurodegenerative disorders. *Nature Reviews Neurology*. 2018;14: 133–150.  
662 doi:10.1038/nrneurol.2017.188
- 663 17. Md S, Z Z, A M, Ar N, Bv Z. Blood-Brain Barrier: From Physiology to Disease and Back. *Physiol Rev*.  
664 2019;99: 21–78. doi:10.1152/physrev.00050.2017
- 665 18. Ortiz GG, Pacheco-Moisés FP, Macías-Islas MÁ, Flores-Alvarado LJ, Mireles-Ramírez MA, González-  
666 Renovato ED, et al. Role of the Blood–Brain Barrier in Multiple Sclerosis. *Archives of Medical*  
667 *Research*. 2014;45: 687–697. doi:10.1016/j.arcmed.2014.11.013
- 668 19. Varatharaj A, Galea I. The blood-brain barrier in systemic inflammation. *Brain, Behavior, and*  
669 *Immunity*. 2017;60: 1–12. doi:10.1016/j.bbi.2016.03.010
- 670 20. Desai BS, Monahan AJ, Carvey PM, Hendey B. Blood-brain barrier pathology in Alzheimer’s and  
671 Parkinson’s disease: implications for drug therapy. *Cell Transplant*. 2007;16: 285–299.  
672 doi:10.3727/000000007783464731
- 673 21. Zhao Z, Nelson AR, Betsholtz C, Zlokovic BV. Establishment and Dysfunction of the Blood-Brain  
674 Barrier. *Cell*. 2015;163: 1064–1078. doi:10.1016/j.cell.2015.10.067
- 675 22. Attwell D, Buchan AM, Charpak S, Lauritzen M, Macvicar BA, Newman EA. Glial and neuronal  
676 control of brain blood flow. *Nature*. 2010;468: 232–243. doi:10.1038/nature09613
- 677 23. Chen Y, Liu X, Vickstrom CR, Liu MJ, Zhao L, Viader A, et al. Neuronal and Astrocytic  
678 Monoacylglycerol Lipase Limit the Spread of Endocannabinoid Signaling in the Cerebellum. *eNeuro*.  
679 2016;3: ENEURO.0048-16.2016. doi:10.1523/ENEURO.0048-16.2016
- 680 24. Mishra A, Reynolds JP, Chen Y, Gourine AV, Rusakov DA, Attwell D. Astrocytes mediate  
681 neurovascular signaling to capillary pericytes but not to arterioles. *Nat Neurosci*. 2016;19: 1619–  
682 1627. doi:10.1038/nn.4428
- 683 25. Hall CN, Reynell C, Gesslein B, Hamilton NB, Mishra A, Sutherland BA, et al. Capillary pericytes  
684 regulate cerebral blood flow in health and disease. *Nature*. 2014;508: 55–60.  
685 doi:10.1038/nature13165
- 686 26. Deng H, Li W. Monoacylglycerol lipase inhibitors: Modulators for lipid metabolism in cancer  
687 malignancy, neurological and metabolic disorders. *Acta Pharmaceutica Sinica B*. 2019 [cited 7 Mar  
688 2020]. doi:10.1016/j.apsb.2019.10.006
- 689 27. League AF, Gorman BL, Hermes DJ, Johnson CT, Jacobs IR, Yadav-Samudrala BJ, et al.  
690 Monoacylglycerol Lipase Inhibitor MJN110 Reduces Neuronal Hyperexcitability, Restores Dendritic  
691 Arborization Complexity, and Regulates Reward-Related Behavior in Presence of HIV-1 Tat.  
692 *Frontiers in Neurology*. 2021;12: 1356. doi:10.3389/fneur.2021.651272
- 693 28. Zanzfirescu A, Ungurianu A, Mihai DP, Radulescu D, Nitulescu GM. Targeting Monoacylglycerol  
694 Lipase in Pursuit of Therapies for Neurological and Neurodegenerative Diseases. *Molecules*.  
695 2021;26: 5668. doi:10.3390/molecules26185668

- 696 29. Schlosburg JE, Blankman JL, Long JZ, Nomura DK, Pan B, Kinsey SG, et al. Chronic monoacylglycerol  
697 lipase blockade causes functional antagonism of the endocannabinoid system. *Nat Neurosci*.  
698 2010;13: 1113–1119. doi:10.1038/nn.2616
- 699 30. Imperatore R, Morello G, Luongo L, Taschler U, Romano R, De Gregorio D, et al. Genetic deletion of  
700 monoacylglycerol lipase leads to impaired cannabinoid receptor CB<sub>1</sub>R signaling and anxiety-like  
701 behavior. *J Neurochem*. 2015;135: 799–813. doi:10.1111/jnc.13267
- 702 31. Zhong P, Pan B, Gao X, Blankman JL, Cravatt BF, Liu Q. Genetic deletion of monoacylglycerol lipase  
703 alters endocannabinoid-mediated retrograde synaptic depression in the cerebellum. *J Physiol*.  
704 2011;589: 4847–4855. doi:10.1113/jphysiol.2011.215509
- 705 32. van Esbroeck ACM, Janssen APA, Cognetta AB, Ogasawara D, Shpak G, van der Kroeg M, et al.  
706 Activity-based protein profiling reveals off-target proteins of the FAAH inhibitor BIA 10-2474.  
707 *Science*. 2017;356: 1084–1087. doi:10.1126/science.aaf7497
- 708 33. PETERSEN A, Benz J, Grether U, Hornsperger B, Kocer B, Kuhn B, et al. Octahydropyrido[1,2-  
709 alpha]pyrazines as magl inhibitors. WO2019134985A1, 2019. Available:  
710 <https://patents.google.com/patent/WO2019134985A1/en>
- 711 34. Schalk-Hihi C, Schubert C, Alexander R, Bayoumy S, Clemente JC, Deckman I, et al. Crystal structure  
712 of a soluble form of human monoglyceride lipase in complex with an inhibitor at 1.35 Å resolution.  
713 *Protein Sci*. 2011;20: 670–683. doi:10.1002/pro.596
- 714 35. McCoy AJ, Grosse-Kunstleve RW, Adams PD, Winn MD, Storoni LC, Read RJ. Phaser crystallographic  
715 software. *J Appl Cryst*. 2007;40: 658–674. doi:10.1107/S0021889807021206
- 716 36. Winn MD, Ballard CC, Cowtan KD, Dodson EJ, Emsley P, Evans PR, et al. Overview of the CCP4 suite  
717 and current developments. *Acta Crystallogr D Biol Crystallogr*. 2011;67: 235–242.  
718 doi:10.1107/S0907444910045749
- 719 37. BUSTER version 2.10.0 – ScienceOpen. [cited 4 Mar 2022]. Available:  
720 <https://www.scienceopen.com/document?vid=34a668bc-6e6f-4572-a548-6d19e78e1e30>
- 721 38. Emsley P, Lohkamp B, Scott WG, Cowtan K. Features and development of Coot. *Acta Crystallogr D*  
722 *Biol Crystallogr*. 2010;66: 486–501. doi:10.1107/S0907444910007493
- 723 39. Weksler BB, Subileau EA, Perrière N, Charneau P, Holloway K, Leveque M, et al. Blood-brain barrier-  
724 specific properties of a human adult brain endothelial cell line. *The FASEB Journal*. 2005;19: 1872–  
725 1874. doi:10.1096/fj.04-3458fje
- 726 40. Janssen APA. Inhibitor selectivity: profiling and prediction. Leiden University. 2019. Available:  
727 <https://hdl.handle.net/1887/71808>
- 728 41. Prokop S, Ábrányi-Balogh P, Barti B, Vámosi M, Zöldi M, Barna L, et al. PharmacostORM nanoscale  
729 pharmacology reveals cariprazine binding on Islands of Calleja granule cells. *Nat Commun*. 2021;12:  
730 6505. doi:10.1038/s41467-021-26757-z
- 731 42. Kis B, Isse T, Snipes JA, Chen L, Yamashita H, Ueta Y, et al. Effects of LPS stimulation on the  
732 expression of prostaglandin carriers in the cells of the blood-brain and blood-cerebrospinal fluid  
733 barriers. *J Appl Physiol (1985)*. 2006;100: 1392–1399. doi:10.1152/jappphysiol.01259.2005

- 734 43. Piro JR, Benjamin DI, Duerr JM, Pi Y, Gonzales C, Wood KM, et al. A Dysregulated Endocannabinoid-  
735 Eicosanoid Network Supports Pathogenesis in a Mouse Model of Alzheimer’s Disease. *Cell Reports*.  
736 2012;1: 617–623. doi:10.1016/j.celrep.2012.05.001
- 737 44. Bernal-Chico A, Canedo M, Manterola A, Victoria Sánchez-Gómez M, Pérez-Samartín A, Rodríguez-  
738 Puertas R, et al. Blockade of monoacylglycerol lipase inhibits oligodendrocyte excitotoxicity and  
739 prevents demyelination in vivo. *Glia*. 2015;63: 163–176. doi:10.1002/glia.22742
- 740 45. Pihlaja R, Takkinen J, Eskola O, Vasara J, López-Picón FR, Haaparanta-Solin M, et al.  
741 Monoacylglycerol lipase inhibitor JZL184 reduces neuroinflammatory response in APdE9 mice and  
742 in adult mouse glial cells. *J Neuroinflammation*. 2015;12: 81. doi:10.1186/s12974-015-0305-9
- 743 46. Müller-Vahl KR, Fremer C, Beals C, Ivkovic J, Loft H, Schindler C. Monoacylglycerol Lipase Inhibition  
744 in Tourette Syndrome: A 12-Week, Randomized, Controlled Study. *Mov Disord*. 2021;36: 2413–  
745 2418. doi:10.1002/mds.28681
- 746 47. Schlosburg JE, Kinsey SG, Ignatowska-Jankowska B, Ramesh D, Abdullah RA, Tao Q, et al. Prolonged  
747 Monoacylglycerol Lipase Blockade Causes Equivalent Cannabinoid Receptor Type 1 Receptor–  
748 Mediated Adaptations in Fatty Acid Amide Hydrolase Wild-Type and Knockout Mice. *J Pharmacol*  
749 *Exp Ther*. 2014;350: 196–204. doi:10.1124/jpet.114.212753
- 750 48. Long JZ, Li W, Booker L, Burston JJ, Kinsey SG, Schlosburg JE, et al. Selective blockade of 2-  
751 arachidonoylglycerol hydrolysis produces cannabinoid behavioral effects. *Nat Chem Biol*. 2009;5:  
752 37–44. doi:10.1038/nchembio.129
- 753 49. Janssen APA, van der Vliet D, Bakker AT, Jiang M, Grimm SH, Campiani G, et al. Development of a  
754 Multiplexed Activity-Based Protein Profiling Assay to Evaluate Activity of Endocannabinoid  
755 Hydrolase Inhibitors. *ACS Chem Biol*. 2018;13: 2406–2413. doi:10.1021/acscchembio.8b00534
- 756 50. Finding fault with Bial’s fatal FAAH inhibitor | *Nature Reviews Drug Discovery*. [cited 6 Oct 2021].  
757 Available: <https://www.nature.com/articles/nrd.2017.129>
- 758 51. Di Marzo V. Endocannabinoid signaling in the brain: biosynthetic mechanisms in the limelight. *Nat*  
759 *Neurosci*. 2011;14: 9–15. doi:10.1038/nn.2720
- 760 52. Pan B, Wang W, Zhong P, Blankman JL, Cravatt BF, Liu Q -s. Alterations of Endocannabinoid  
761 Signaling, Synaptic Plasticity, Learning, and Memory in Monoacylglycerol Lipase Knock-out Mice.  
762 *Journal of Neuroscience*. 2011;31: 13420–13430. doi:10.1523/JNEUROSCI.2075-11.2011
- 763 53. Dabertrand F, Hannah RM, Pearson JM, Hill-Eubanks DC, Brayden JE, Nelson MT. Prostaglandin E2,  
764 a postulated astrocyte-derived neurovascular coupling agent, constricts rather than dilates  
765 parenchymal arterioles. *J Cereb Blood Flow Metab*. 2013;33: 479–482. doi:10.1038/jcbfm.2013.9
- 766 54. Yang AC, Vest RT, Kern F, Lee DP, Agam M, Maat CA, et al. A human brain vascular atlas reveals  
767 diverse mediators of Alzheimer’s risk. *Nature*. 2022; 1–8. doi:10.1038/s41586-021-04369-3
- 768 55. Hartz AMS, Rempe RG, Soldner ELB, Pekcec A, Schlichtiger J, Kryscio R, et al. Cytosolic  
769 phospholipase A2 is a key regulator of blood-brain barrier function in epilepsy. *The FASEB Journal*.  
770 2019;33: 14281–14295. doi:10.1096/fj.201901369RR

- 771 56. Farooqui AA, Ong W-Y, Horrocks LA. Inhibitors of Brain Phospholipase A2 Activity: Their  
772 Neuropharmacological Effects and Therapeutic Importance for the Treatment of Neurologic  
773 Disorders. *Pharmacol Rev.* 2006;58: 591–620. doi:10.1124/pr.58.3.7
- 774 57. Katz PS, Sulzer JK, Impastato RA, Teng SX, Rogers EK, Molina PE. Endocannabinoid Degradation  
775 Inhibition Improves Neurobehavioral Function, Blood–Brain Barrier Integrity, and  
776 Neuroinflammation following Mild Traumatic Brain Injury. *J Neurotrauma.* 2015;32: 297–306.  
777 doi:10.1089/neu.2014.3508
- 778 58. Choi S-H, Aid S, Bosetti F. The distinct roles of cyclooxygenase-1 and -2 in neuroinflammation:  
779 implications for translational research. *Trends in Pharmacological Sciences.* 2009;30: 174–181.  
780 doi:10.1016/j.tips.2009.01.002
- 781 59. Zhu J, Li S, Zhang Y, Ding G, Zhu C, Huang S, et al. COX-2 contributes to LPS-induced Stat3 activation  
782 and IL-6 production in microglial cells. *Am J Transl Res.* 2018;10: 966–974.
- 783 60. Brian JE, Moore SA, Faraci FM. Expression and Vascular Effects of Cyclooxygenase-2 in Brain.  
784 *Stroke.* 1998;29: 2600–2606. doi:10.1161/01.STR.29.12.2600
- 785 61. Kozak KR, Rowlinson SW, Marnett LJ. Oxygenation of the Endocannabinoid, 2-Arachidonylglycerol,  
786 to Glycerol Prostaglandins by Cyclooxygenase-2\*. *Journal of Biological Chemistry.* 2000;275:  
787 33744–33749. doi:10.1074/jbc.M007088200
- 788 62. Turcotte C, Zarini S, Jean S, Martin C, Murphy RC, Marsolais D, et al. The Endocannabinoid  
789 Metabolite Prostaglandin E2 (PGE2)-Glycerol Inhibits Human Neutrophil Functions: Involvement of  
790 Its Hydrolysis into PGE2 and EP Receptors. *The Journal of Immunology.* 2017;198: 3255–3263.  
791 doi:10.4049/jimmunol.1601767
- 792 63. Brüser A, Zimmermann A, Crews BC, Sliwoski G, Meiler J, König GM, et al. Prostaglandin E2 glyceryl  
793 ester is an endogenous agonist of the nucleotide receptor P2Y6. *Sci Rep.* 2017;7: 2380.  
794 doi:10.1038/s41598-017-02414-8
- 795 64. Hu SS-J, Bradshaw HB, Chen JS-C, Tan B, Walker JM. Prostaglandin E2 glycerol ester, an endogenous  
796 COX-2 metabolite of 2-arachidonoylglycerol, induces hyperalgesia and modulates NFkappaB  
797 activity. *Br J Pharmacol.* 2008;153: 1538–1549. doi:10.1038/bjp.2008.33
- 798 65. Oliveira-Giacomelli Á, M. Albino C, de Souza HDN, Corrêa-Velloso J, de Jesus Santos AP, Baranova J,  
799 et al. P2Y6 and P2X7 Receptor Antagonism Exerts Neuroprotective/ Neuroregenerative Effects in  
800 an Animal Model of Parkinson’s Disease. *Frontiers in Cellular Neuroscience.* 2019;13: 476.  
801 doi:10.3389/fncel.2019.00476
- 802 66. Riegel A-K, Faigle M, Zug S, Rosenberger P, Robaye B, Boeynaems J-M, et al. Selective induction of  
803 endothelial P2Y6 nucleotide receptor promotes vascular inflammation. *Blood.* 2011;117: 2548–  
804 2555. doi:10.1182/blood-2010-10-313957
- 805 67. Minogue AM, Jones RS, Kelly RJ, McDonald CL, Connor TJ, Lynch MA. Age-associated dysregulation  
806 of microglial activation is coupled with enhanced blood-brain barrier permeability and pathology in  
807 APP/PS1 mice. *Neurobiol Aging.* 2014;35: 1442–1452. doi:10.1016/j.neurobiolaging.2013.12.026

808 68. Errede M, Girolamo F, Ferrara G, Strippoli M, Morando S, Boldrin V, et al. Blood-Brain Barrier  
809 Alterations in the Cerebral Cortex in Experimental Autoimmune Encephalomyelitis. J Neuropathol  
810 Exp Neurol. 2012;71: 840–854. doi:10.1097/NEN.0b013e31826ac110

811

812 **Supplementary Table 1.** Data collection and refinement statistics for human MAGL compound 432  
813 complex

814

815

---

|                                                     | human MAGL<br>compound 432<br>complex |
|-----------------------------------------------------|---------------------------------------|
| <b>Data collection</b>                              |                                       |
| Space group                                         | C222 <sub>1</sub>                     |
| Cell dimensions                                     |                                       |
| <i>a</i> , <i>b</i> , <i>c</i> (Å)                  | 89.96, 127.45, 63.03                  |
| $\alpha$ , $\beta$ , $\gamma$ (°)                   | 90, 90, 90                            |
| Resolution (Å)                                      | 1.16 (1.26-1.16)                      |
| <i>R</i> <sub>sym</sub>                             | 0.057 (0.80)                          |
| <i>I</i> / $\sigma I$                               | 11.27 (1.09)                          |
| CC(1/2)                                             | 0.999 (0.584)                         |
| Completeness                                        | 99.8 (99.5)                           |
| Redundancy                                          | 6.39 (5.99)                           |
| <b>Refinement</b>                                   |                                       |
| Resolution (Å)                                      | 63.72 – 1.16                          |
| No. reflections                                     | 122098                                |
| <i>R</i> <sub>work</sub> / <i>R</i> <sub>free</sub> | 17.72/18.71                           |
| No. atoms                                           |                                       |
| Protein                                             | 2306                                  |
| Water                                               | 377                                   |
| Ligand                                              | 28                                    |
| <i>B</i> -factors                                   |                                       |
| Protein                                             | 18.12                                 |
| Water                                               | 34.30                                 |
| Ligand                                              | 19.25                                 |
| R.m.s. deviations                                   |                                       |
| Bond lengths (Å)                                    | 0.008                                 |
| Bond angles (°)                                     | 0.950                                 |

---

816 \*Values in parentheses are for highest-resolution shell.

817

818

819

820

821

822

823

824

825 **Supplementary Table 2.** Droplet digital qRT-PCR TaqMan assays. Mm = *Mus musculus*, Hs = *Homo*

826 *sapiens*.

827

828

| Target (species)         | Catalogue ID  | Fluorophore |
|--------------------------|---------------|-------------|
| <b><i>Mgll</i> (Ms)</b>  | Mm00449274_m1 | FAM         |
| <b><i>IL-1β</i> (Ms)</b> | Mm00434228_m1 | FAM         |
| <b><i>IL-6</i> (Ms)</b>  | Mm00446190_m1 | FAM         |
| <b><i>LCN2</i> (Ms)</b>  | Mm01324470_m1 | FAM         |
| <b><i>TNF</i> (Ms)</b>   | Mm00443258_m1 | FAM         |
| <b><i>EMC7</i> (Ms)</b>  | Mm00505280_m1 | VIC         |
|                          |               |             |
| <b><i>Mgll</i> (Hs)</b>  | Hs00996004_m1 | FAM         |
| <b><i>EMC7</i> (Hs)</b>  | Hs00220077_m1 | VIC         |

829 **Figure S1. MAGLi 432 displays highly selective MAGL inhibition in human and mouse brain lysates.**  
830 Selectivity of MAGLi 432 in human (A) and mouse (B) brain lysates was determined by gel based,  
831 competitive Activity Based Protein Profiling (ABPP). Brain lysates were incubated with either DMSO, 10  
832  $\mu$ M MAGLi 432 or 10  $\mu$ M JZL 184 for 30 mins and then incubated with either broad serine hydrolase  
833 activity based probe, TAMRA-FP (green) or MAGL-specific probe (red) before samples were loaded on an  
834 SDS-PAGE gel and proteins separated by electrophoresis. Gels referenced from Fig 1 were  
835 counterstained with Coomassie Brilliant Blue to visualize total protein per lane (n=2). Normalized MAGL  
836 activity quantified as the average signal intensity for each probe divided by total protein bands observed  
837 at the corresponding MW to MAGL bands (Coomassie Blue signal) (Fig 1).

838 **Figure S2. ABPP and WB quantitative analysis of MAGLi 432 dose-dependent potency in human and**  
839 **mouse brain lysates (Fig 1 I, J).** Assessment of MAGLi 432 potency was measured by incubation of  
840 ascending doses of MAGLi 432 in human brain lysates (A, C) and mouse brain lysates (B,D) as measured  
841 by competitive ABPP with the MAGL-specific probe. Average signal intensity of active MAGL and total  
842 MAGL protein in lysates quantified (A,B) as total detectable active MAGL band signal (ABPP) over total  
843 MAGL band signal (WB) or (C,D) total MAGL protein over total  $\beta$ -actin band signal (n =2).

844 **Figure S3.** Quantification of active MAGL (ABPP) and total MAGL protein (WB) in human (Fig 2D) and  
845 mouse (Fig 2G) NVU cells. Active MAGL was measured by incubation with the MAGL-specific probe via  
846 ABPP. Total MAGL protein expression and  $\beta$ -actin were determined by WB. Average signal intensity of  
847 active MAGL and total protein in lysates quantified (A,B) as total detectable active MAGL band signal  
848 (ABPP) over total MAGL band signal (WB) or (C,D) total MAGL protein over total  $\beta$ -actin band signal (n  
849 =2). Results are reported as mean  $\pm$  SD, one-way ANOVA (ns = not significant, \* = p < 0.05, \*\* = p < 0.01,  
850 \*\*\* = p < 0.001, \*\*\*\* = p < 0.0001).

851 **Figure S4.** Quantification of dose-response ABPP and WB to determine potency of MAGLi 432 in human  
852 NVU cells (BMECs, pHA and pHP) (Fig 3 A, B). Assessment of MAGLi 432 potency *in vitro* was measured  
853 by incubation of ascending doses of MAGLi 432 (10nM, 100nM, 1 $\mu$ M, 10 $\mu$ M) in human NVU Cells for 6  
854 hours. Cell lysates from each group were then collected and then incubated with the MAGL-specific  
855 probe. Proteins were then separated by gel electrophoresis and in gel fluorescence was measured.  
856 Average signal intensity of active MAGL and total MAGL protein in lysates quantified (A) as total  
857 detectable active MAGL band signal (ABPP) over total MAGL band signal (WB) or (B) total MAGL protein  
858 over total  $\beta$ -actin band signal, with the highest signal normalized to 100%. (n =2).

859 **Figure S5.** Quantification of MAGL inhibition *in vitro* by MAGLi 432 in human NVU cells (hCMEC/D3, pHA  
860 and pHP) (from Fig 3 C, D). Assessment of MAGLi 432 *in vitro* was measured by incubation of DMSO  
861 (solvent control) or 1 $\mu$ M MAGLi 432 with human NVU cell cultures for 6 hours. Cell lysates from each  
862 group were then collected and then incubated with the MAGL-specific probe. Proteins were then  
863 separated by gel electrophoresis and in gel fluorescence was measured. Average signal intensity of active  
864 MAGL and total MAGL protein in lysates quantified (A) as total detectable active MAGL band signal  
865 (ABPP) over total MAGL band signal (WB) or (B) total MAGL protein over total  $\beta$ -actin band signal. (n =2).

866 **Figure S6.** LPS modifies active and total MAGL protein expression in a cell-specific manner.  
867 Quantification of effects of HBSS (solvent control) and LPS (50ng and 100ng) *in vitro* by MAGLi 432 in  
868 human NVU cells (hCMEC/D3, pHA and pHP) (from Fig 4 A, B). Assessment of MAGLi 432 potency *in vitro*  
869 was measured by incubation of 1 $\mu$ M MAGLi 432 in human NVU Cells for 6 hours. Cell lysates from each  
870 group were then collected and then incubated with the MAGL-specific probe. Proteins were then  
871 separated by gel electrophoresis and in gel fluorescence was measured. Average signal intensity of active



872 MAGL and total MAGL protein in lysates quantified (**A**) as total detectable active MAGL band signal  
873 (ABPP) over total MAGL band signal (WB) or (**B**) total MAGL protein over total  $\beta$ -actin band signal. (n =2).

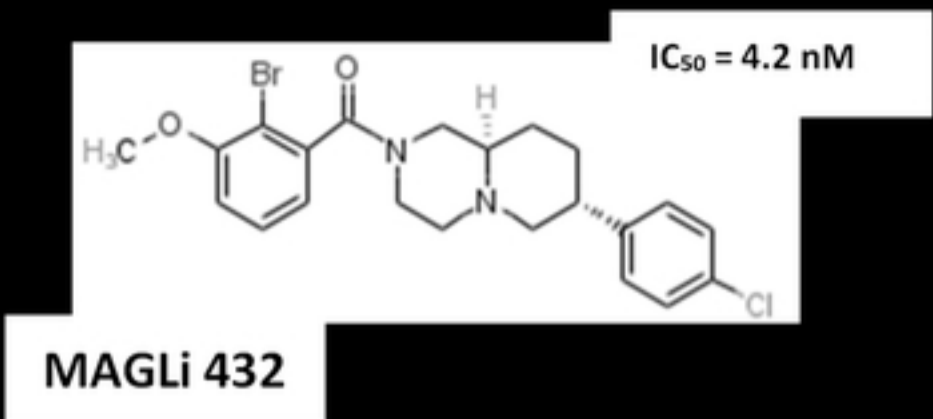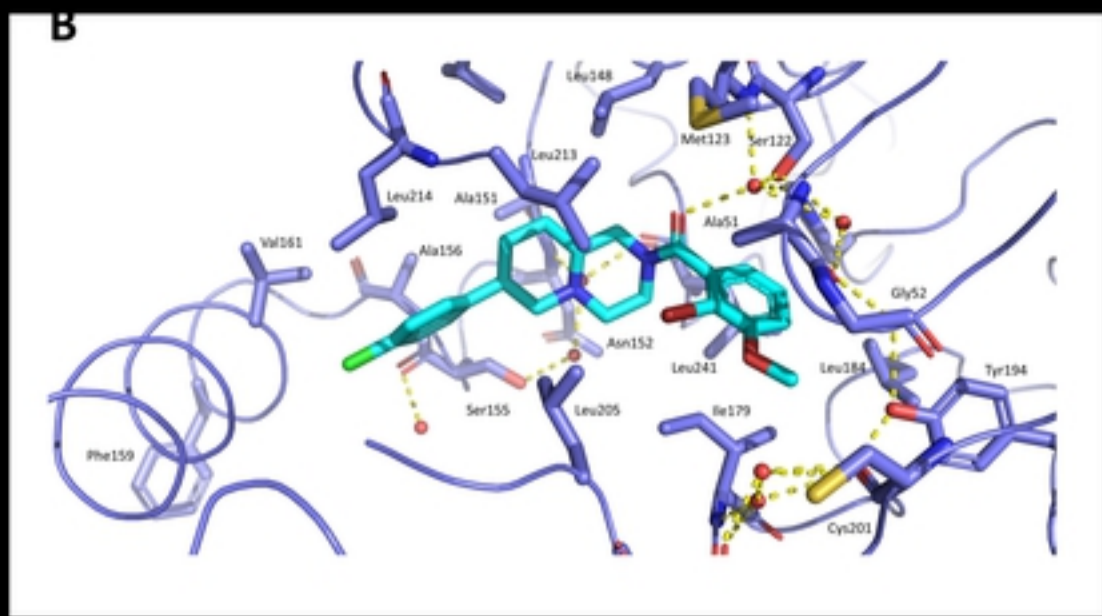

<https://doi.org/10.1101/2022.05.04.490688>

CC-BY 4.0 International license

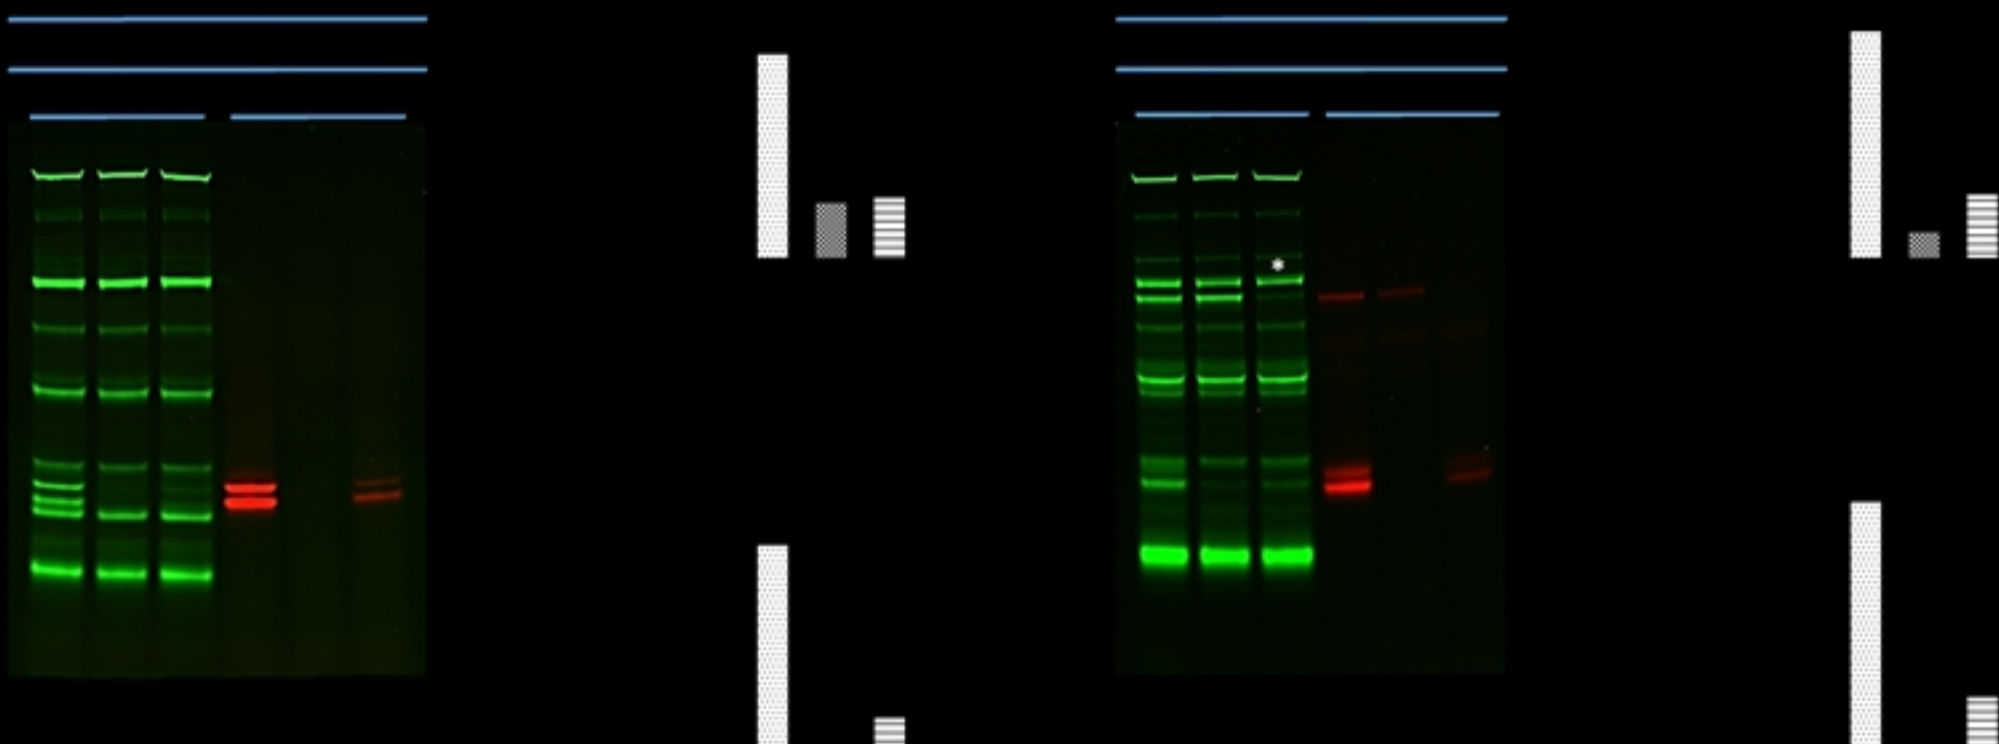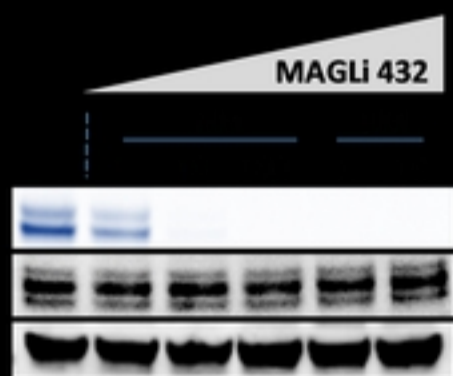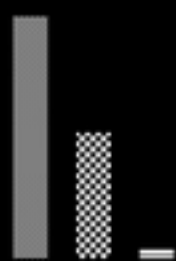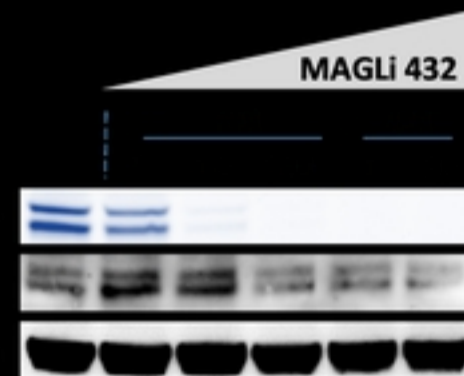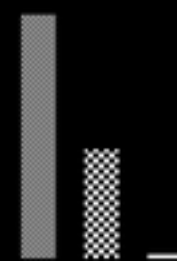

Figure 1

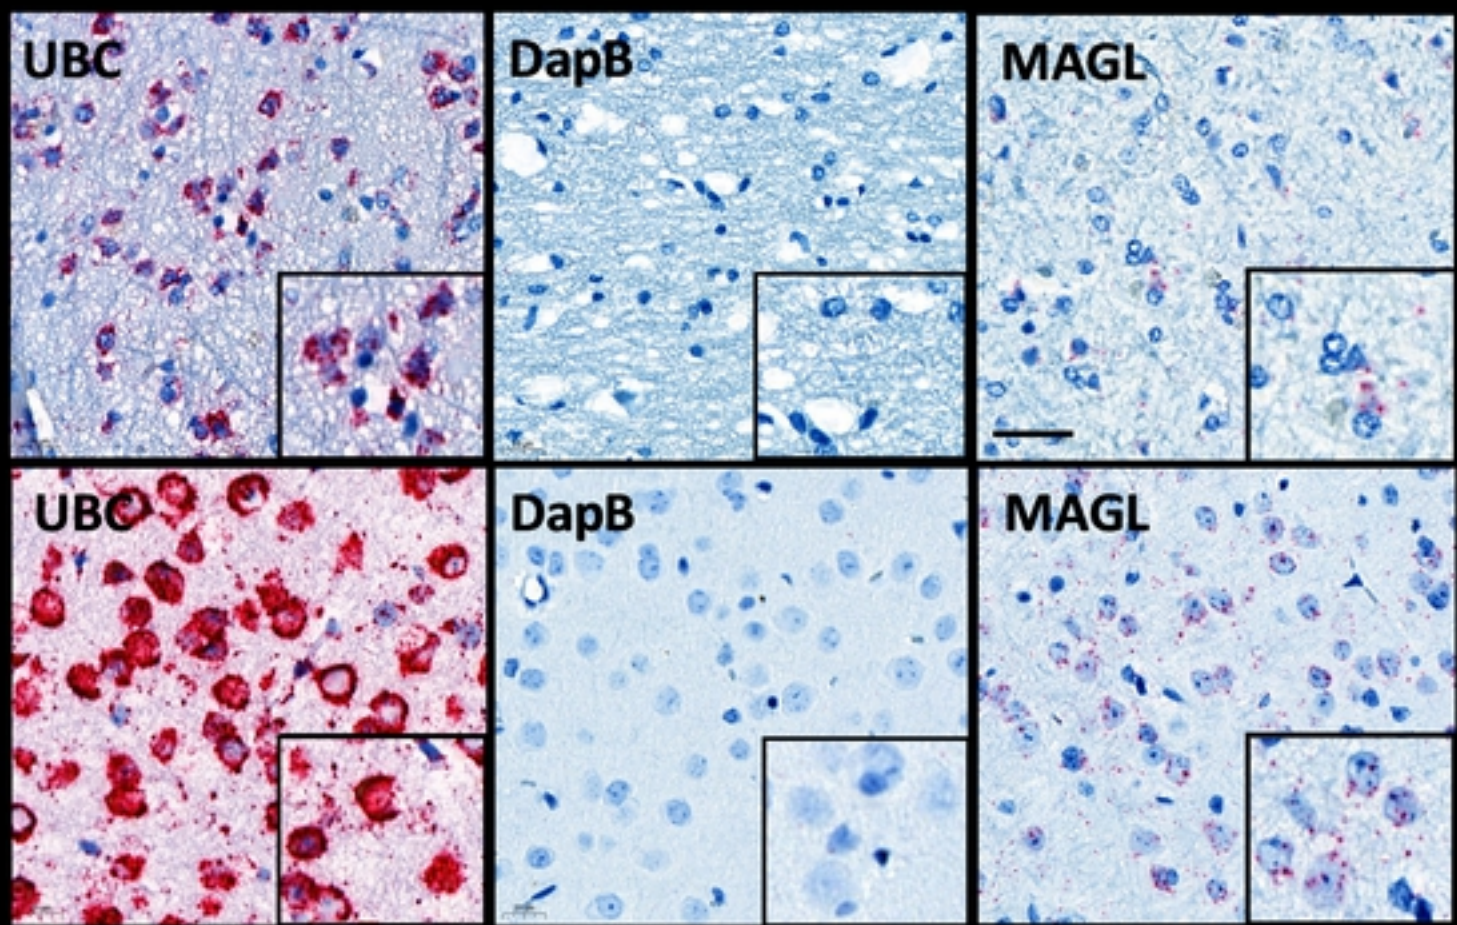

DAPI MGLL ISH CD31

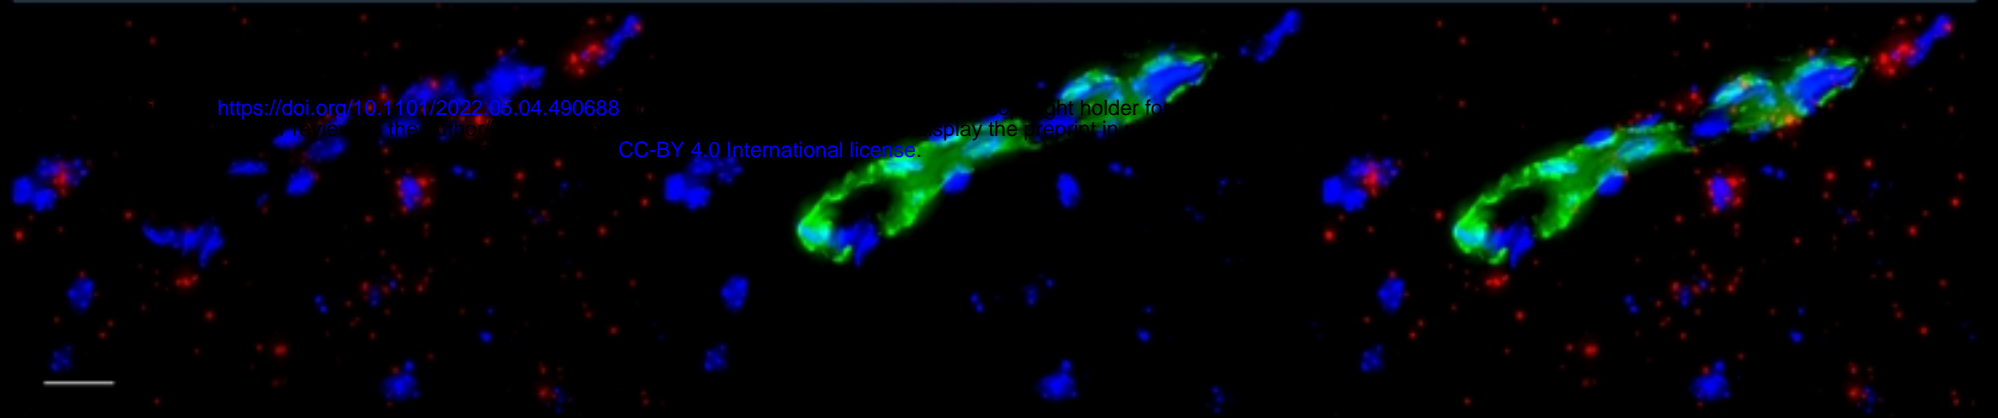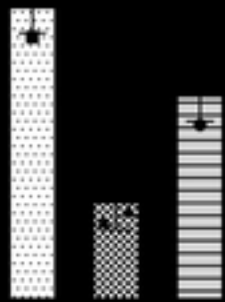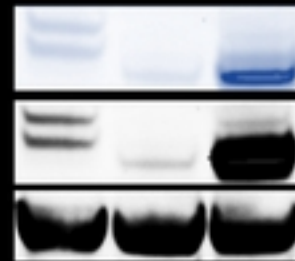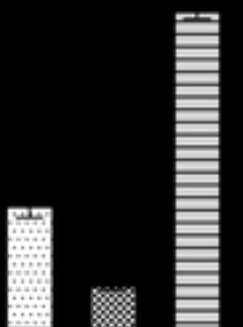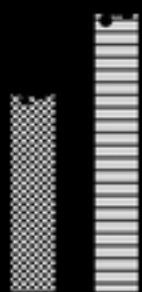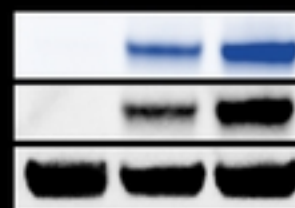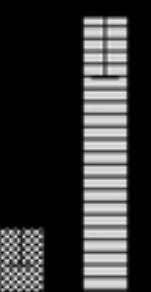

Figure 2

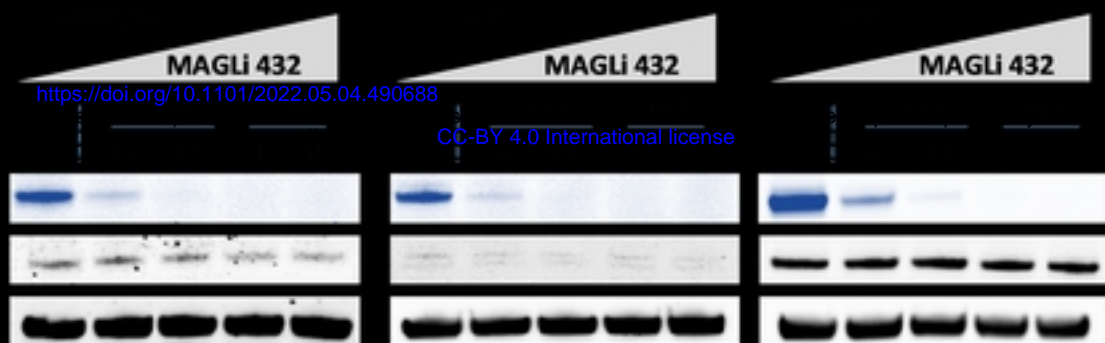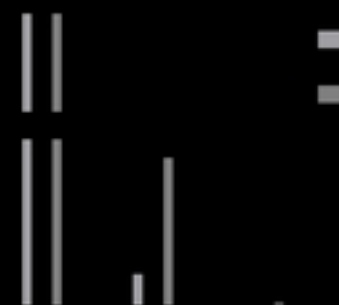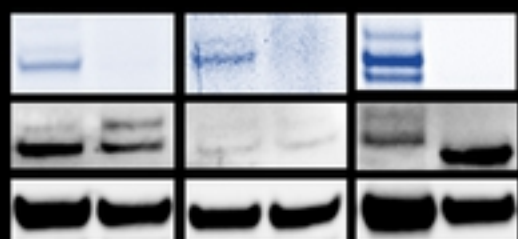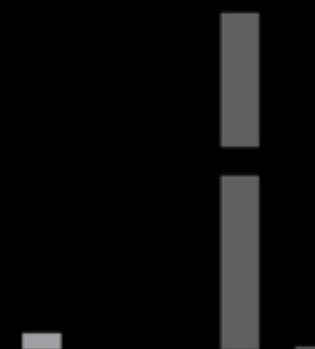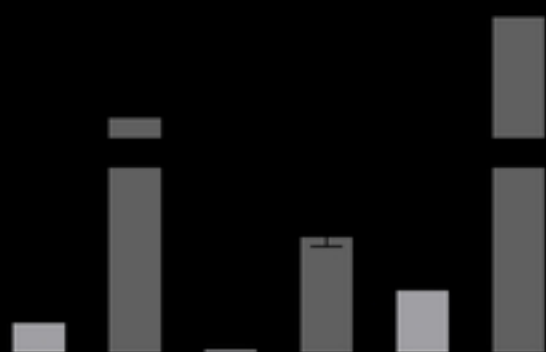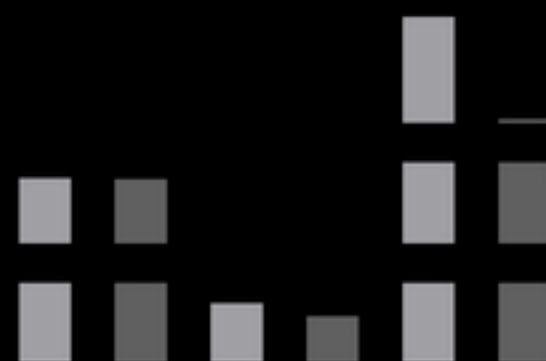

Figure 3

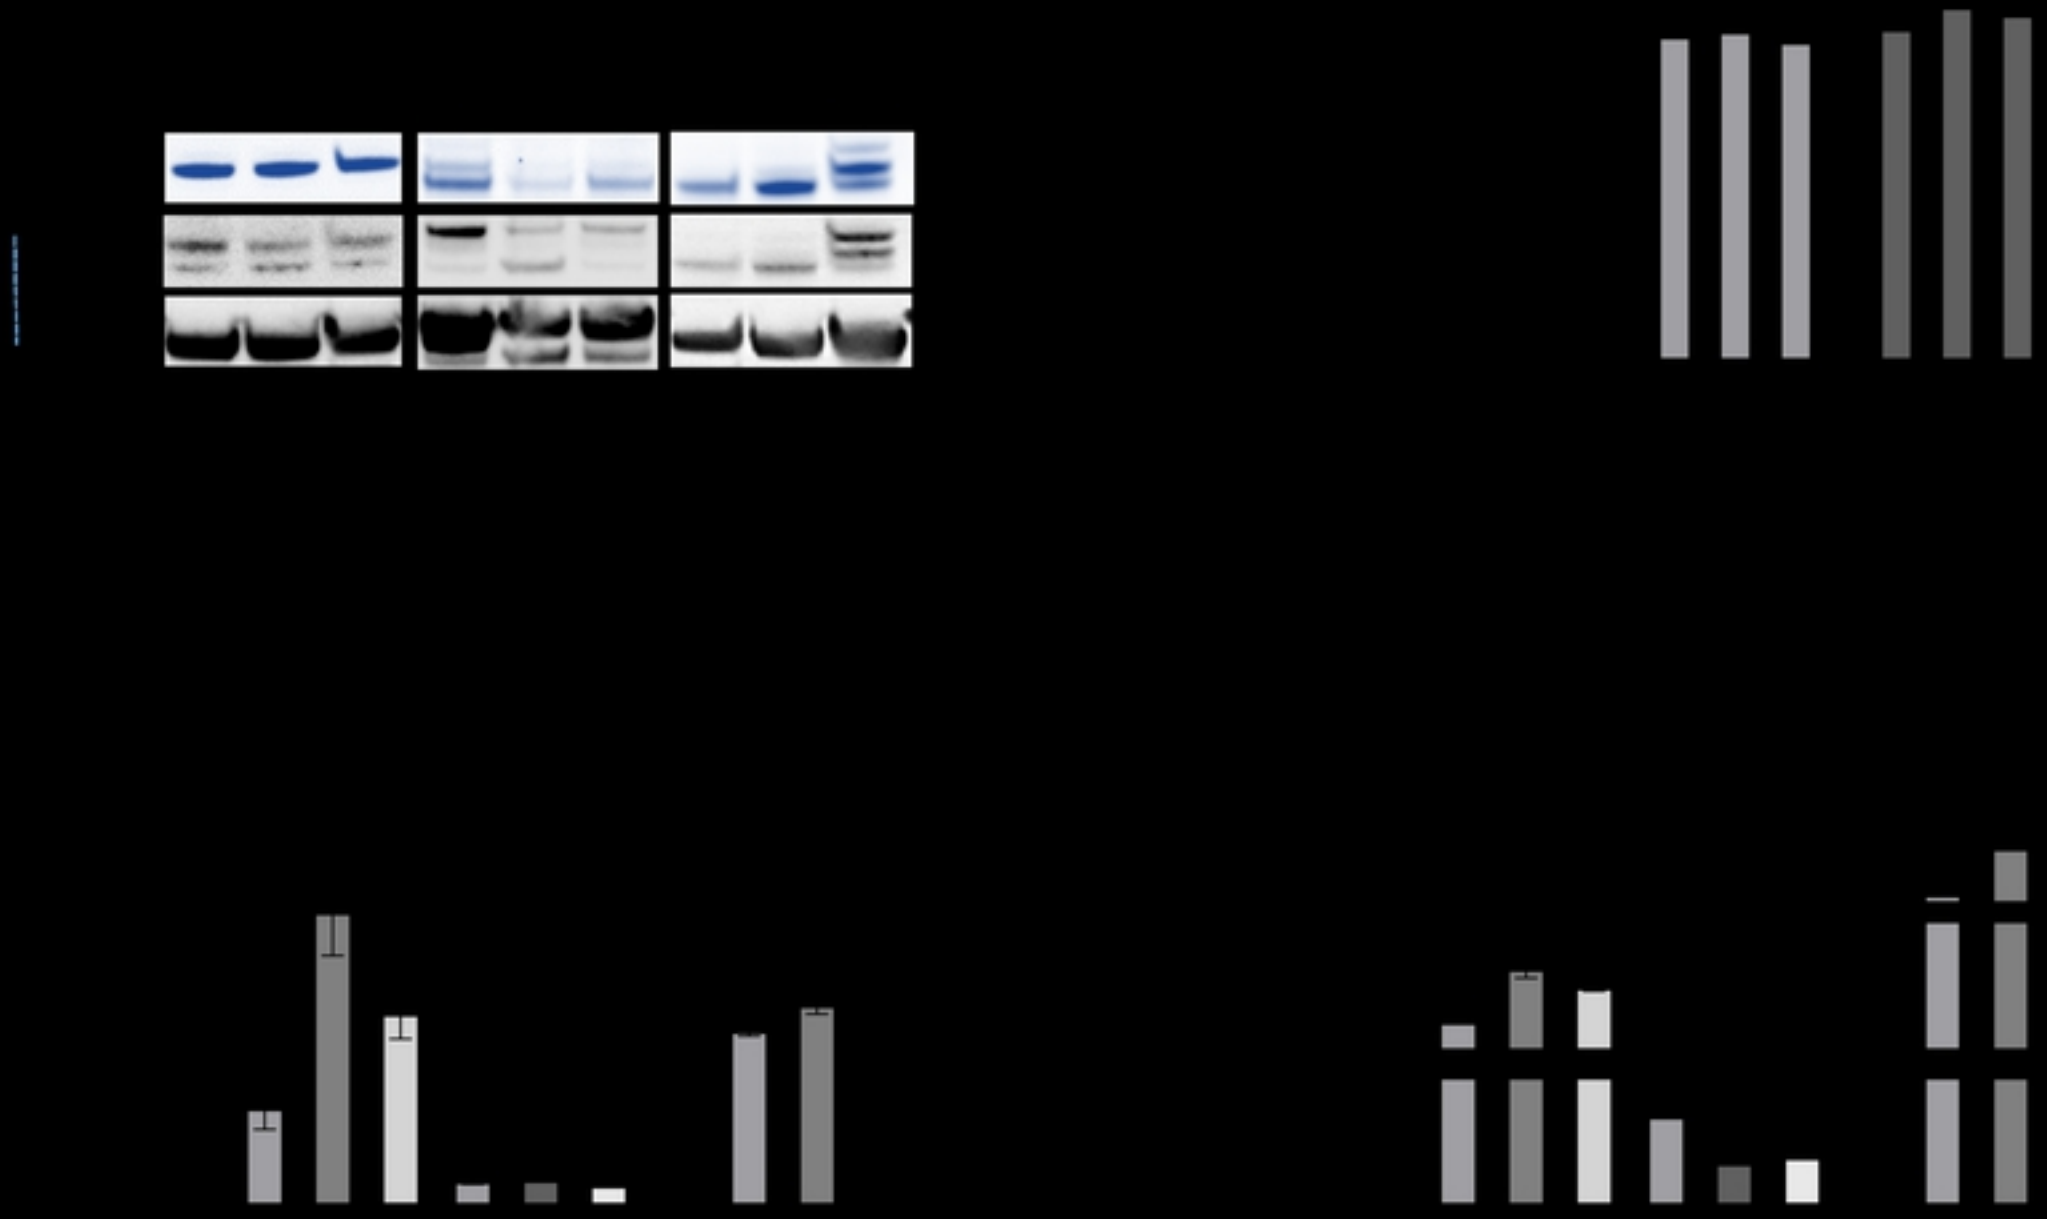

Figure 4

| Treatment Groups |      |             |
|------------------|------|-------------|
| Group 1          | NaCl | + Vehicle   |
| Group 2          | LPS  | + MAGLI 432 |
| Group 3          | LPS  | + Vehicle   |

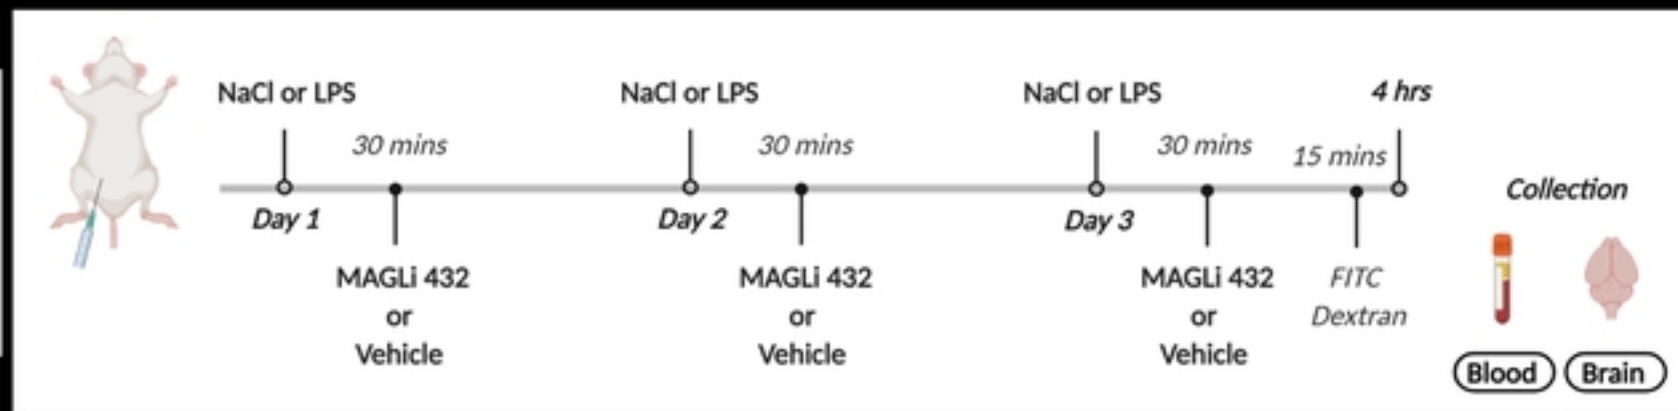

<https://doi.org/10.1101/2022.05.04.490688>

CC-BY 4.0 International license

LPS + MAGLI 432

LPS + Vehicle

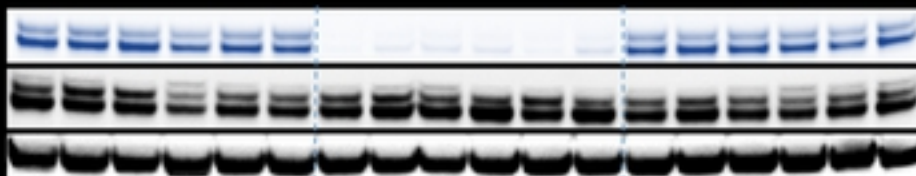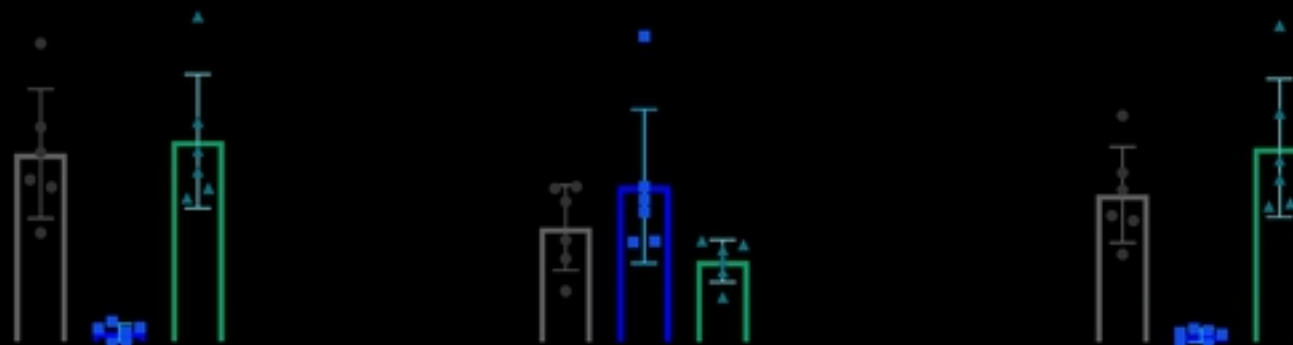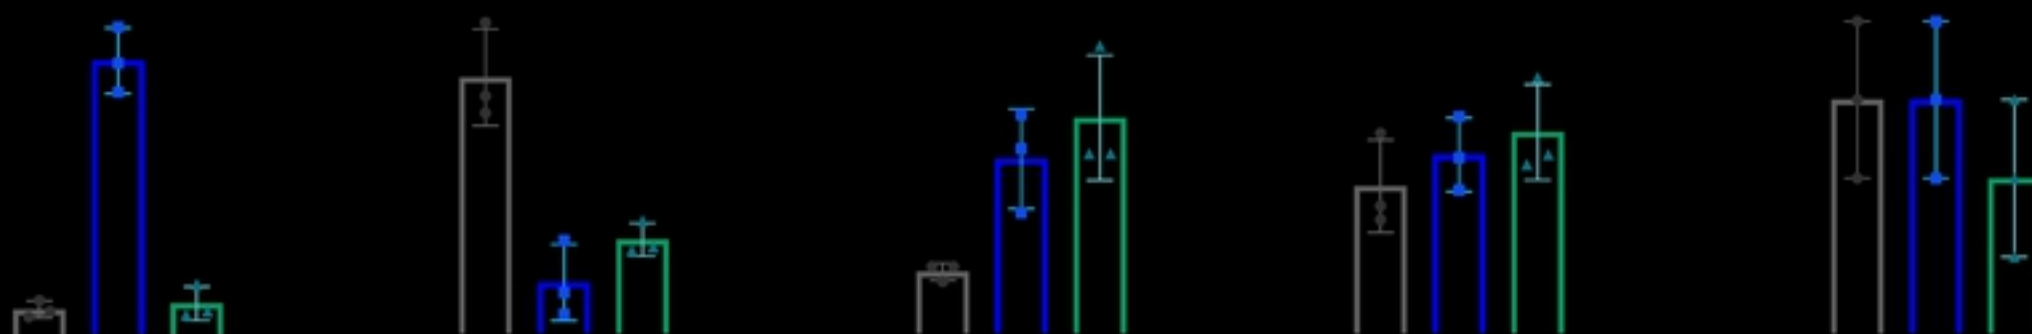

Figure 5

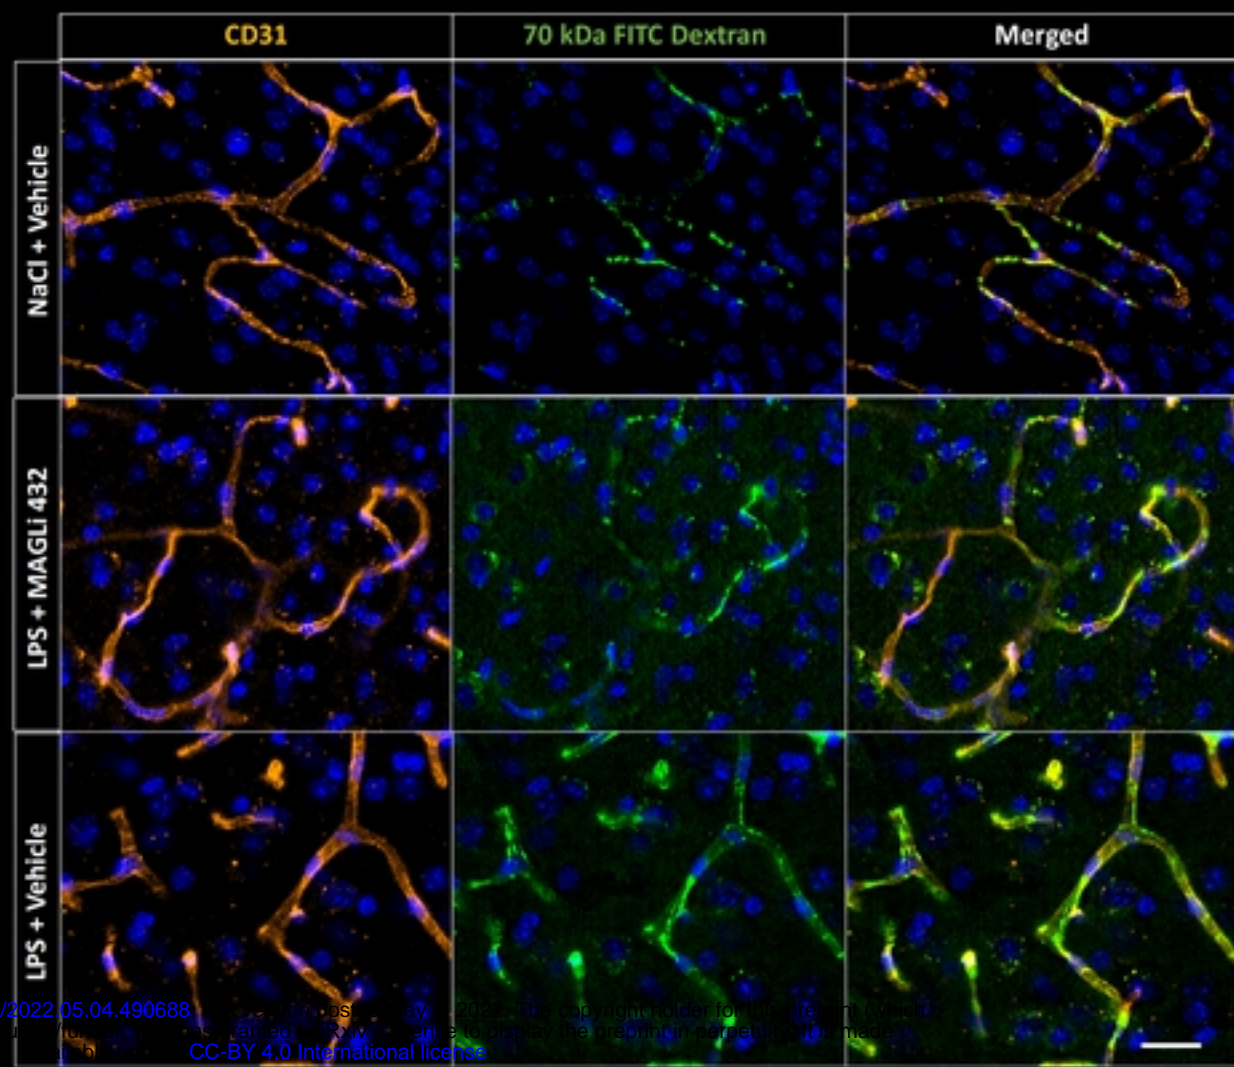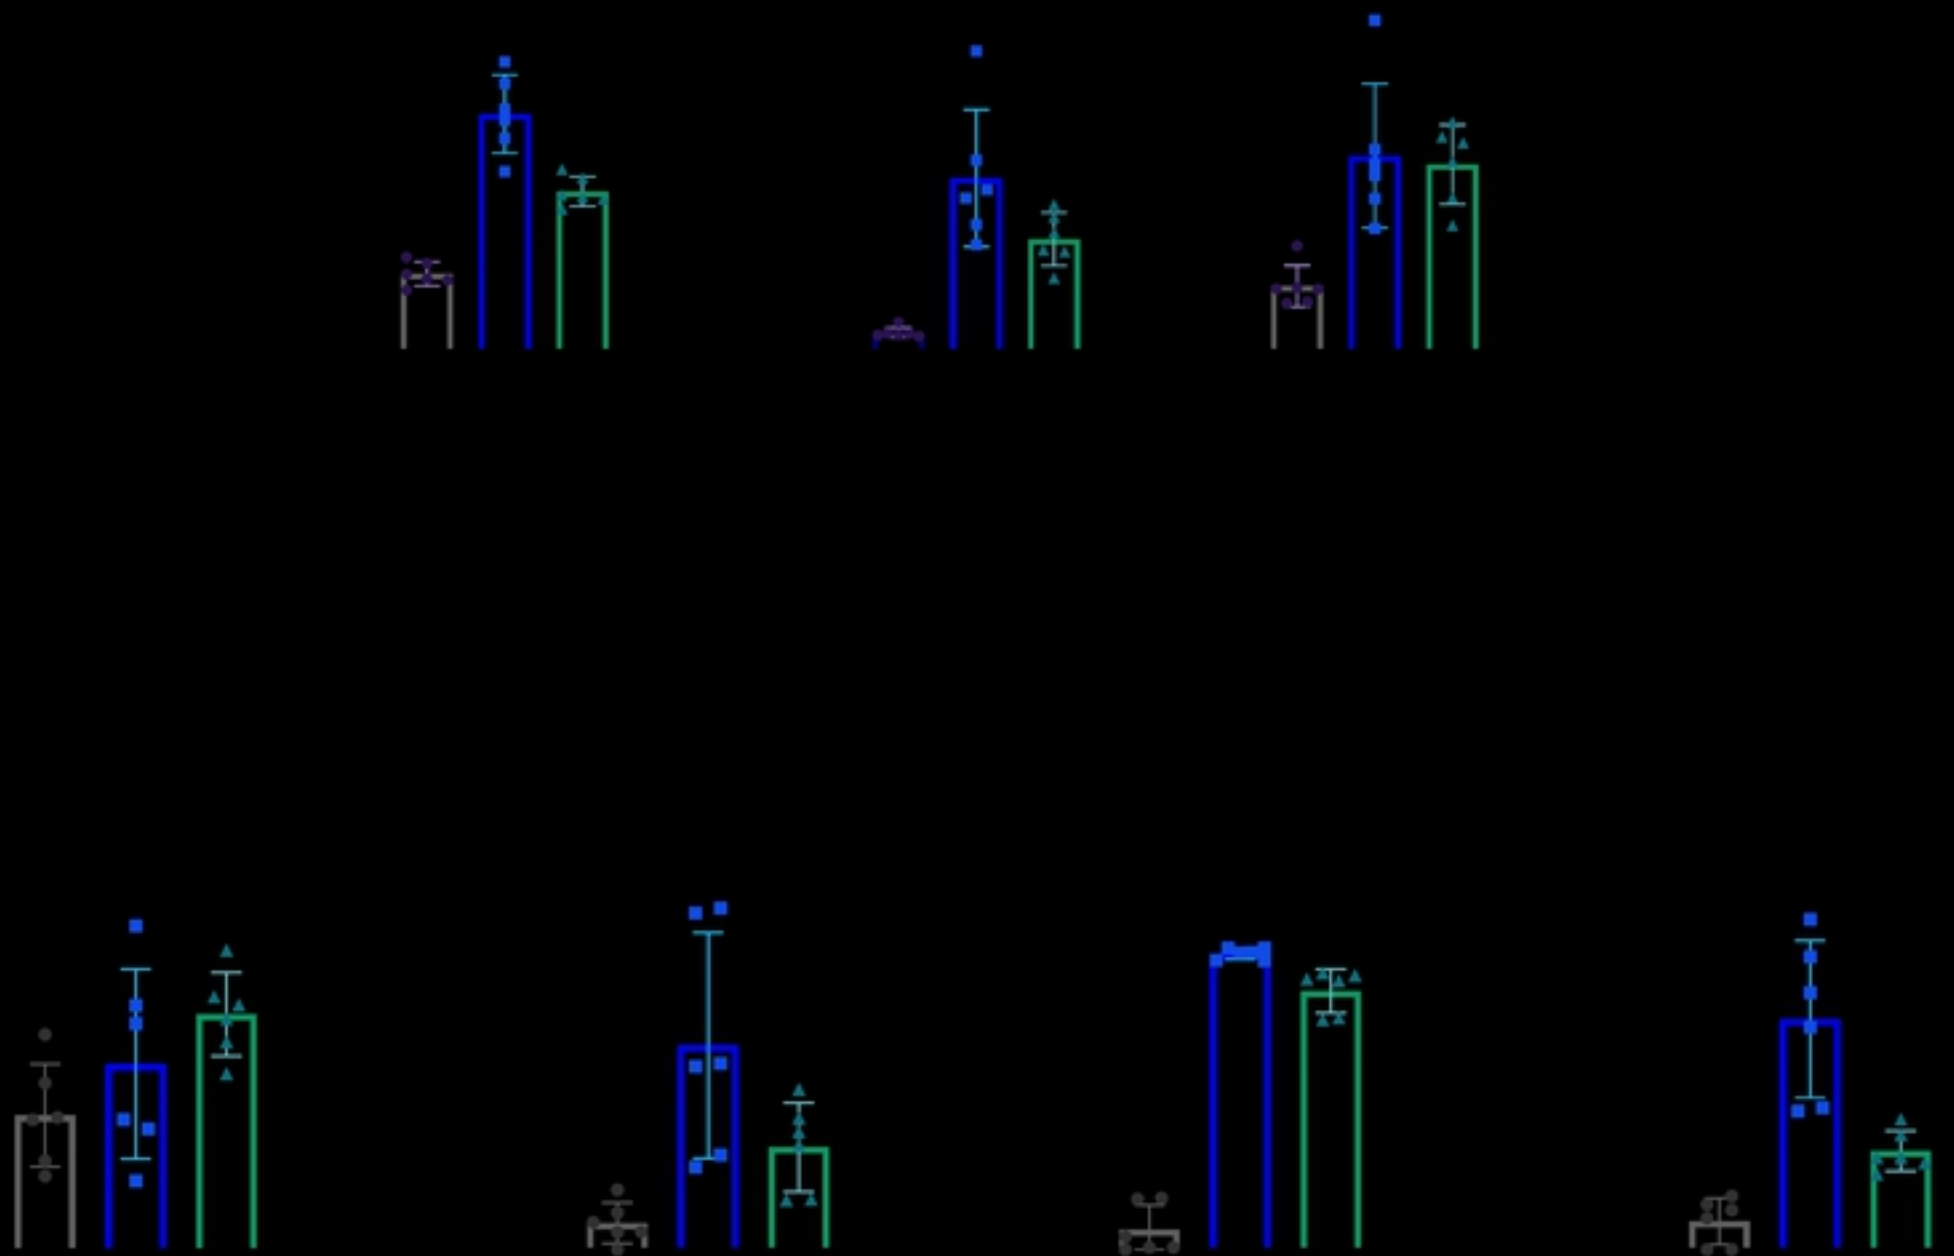

Figure 6
